# Supplementary material
Source: publisher site journal article supplement (https://www.dovepress.com/article/321919)
Supplement: Supplementary file 1 [file get_supplementary_file.php]

**Supplemetary Table 1.** Demographic characteristics of the studied subjects.

**Supplemetary Table 2.** Comparision between SBT and SNP2HLA.

**Supplemetary Table 3.** Summary of significant variants associated with HBV-related HCC in Han Chinese.

**Supplemetary Table 4.** Summary of the most significant amino acid polymorphisms associated with HBV-related HCC in Han Chinese (P＜1×10-3).

**Supplemetary Table 5.** Confirmation results of reported SNPs by GWAS in HLA region.

**Supplemetary Table 6.** Association between HLA zygosity and hepatocellular carcinoma (HCC).

**Supplemetary Table 1. Demographic characteristics of the studied subjects**

| **Characteristics** | **Total** | **CHB patients with HCC** | **CHB patients without HCC** |
| --- | --- | --- | --- |
| Number | 2514 | 1161 | 1353 |
| Gender |  |  |  |
| Male, n (%) | 1821(72.43） | 900(77.52) | 921(68.07) |
| Female, n (%) | 693(27.57） | 261(22.48) | 432(31.93) |
| Age, years |  |  |  |
| Mean (SD) | 50.53(11.06) | 52.73(10.48) | 48.62(11.20) |
| ≤50, n (%) | 1318(52.43) | 525(45.22) | 793(58.61) |
| ＞50, n (%) | 1196(47.57) | 636(54.78) | 560(41.39) |

**Supplemetary Table 2. Comparision between SBT and SNP2HLA.**

| **HLA allele** | **INFO score  in imputation** | **Frequency  in imputation** | **Both Present in  SBT and Imputation** | **Present in SBT  but not in Imputation** | **Absent in SBT but  present in Imputation** | **Both absent in  SBT and imputation** | **Sensitivity** | **Specificity** | **Accuracy** |
| --- | --- | --- | --- | --- | --- | --- | --- | --- | --- |
|
| HLA_DQA1_0303 | 0.7392 | 0.0503 | 96 | 5 | 2 | 833 | 9.50E-01 | 9.98E-01 | 9.93E-01 |
| HLA_DQA1_0601 | 0.7379 | 0.1157 | 262 | 1 | 1 | 672 | 9.96E-01 | 9.99E-01 | 9.97E-01 |
| HLA_DQB1_0301 | 0.9701 | 0.3048 | 458 | 2 | 13 | 463 | 9.96E-01 | 9.73E-01 | 9.79E-01 |
| HLA_DQB1_0303 | 0.9528 | 0.2714 | 450 | 2 | 5 | 479 | 9.96E-01 | 9.90E-01 | 9.90E-01 |
| HLA_DQB1_0601 | 0.9902 | 0.0982 | 190 | 0 | 2 | 744 | 1.00E+00 | 9.97E-01 | 9.98E-01 |
| HLA_DQB1_0602 | 0.8115 | 0.0526 | 69 | 2 | 3 | 862 | 9.72E-01 | 9.97E-01 | 9.95E-01 |
| HLA_DRB1_0301 | 0.8705 | 0.0503 | 99 | 0 | 2 | 835 | 1.00E+00 | 9.98E-01 | 9.98E-01 |
| HLA_DRB1_0405 | 0.9128 | 0.0523 | 89 | 3 | 3 | 841 | 9.67E-01 | 9.96E-01 | 9.94E-01 |
| HLA_DRB1_0803 | 0.9094 | 0.09 | 155 | 0 | 2 | 779 | 1.00E+00 | 9.97E-01 | 9.98E-01 |
| HLA_DRB1_0901 | 0.9546 | 0.2594 | 427 | 3 | 5 | 501 | 9.93E-01 | 9.90E-01 | 9.90E-01 |
| HLA_DRB1_1202 | 0.8305 | 0.1346 | 248 | 12 | 2 | 674 | 9.54E-01 | 9.97E-01 | 9.84E-01 |
| HLA_DRB1_1501 | 0.9339 | 0.0659 | 101 | 3 | 2 | 830 | 9.71E-01 | 9.98E-01 | 9.95E-01 |

**Supplemetary Table 3. Summary of significant variants associated with HBV-related HCC in Han Chinese.**

| **Variants** | **Effect a** | **EAF b** | | **Pc** | **ORc** | **Pfdrd** | **Condition on rs114401688** | | | **Condition on rs114401688 and rs115126566** | | |
| --- | --- | --- | --- | --- | --- | --- | --- | --- | --- | --- | --- | --- |
| **Cases** | **Controls** | **Pc** | **ORc** | **Pfdre** | **Pc** | **ORc** | **Pfdrf** |
| rs114401688 | G | 0.08096 | 0.1227 | 1.05E-06 | 0.6194 | 2.43E-03 | NAg | NAg | NAg | NAg | NAg | NAg |
| rs116738975 | C | 0.04608 | 0.07687 | 4.43E-06 | 0.5636 | 2.43E-03 | 1.65E-01 | 0.77(0.53-1.12) | 6.95E-01 | 2.60E-01 | 0.8(0.55-1.17) | 8.11E-01 |
| SNP_DRB1_32660110_AC | A | 0.1619 | 0.2121 | 4.84E-06 | 0.7112 | 2.43E-03 | 4.35E-02 | 0.83(0.69-0.99) | 4.92E-01 | 3.50E-02 | 0.82(0.68-0.99) | 5.09E-01 |
| HLA_DQB1_04 | P | 0.04608 | 0.0765 | 5.38E-06 | 0.5652 | 2.43E-03 | 1.85E-01 | 0.78(0.53-1.13) | 7.07E-01 | 2.85E-01 | 0.81(0.56-1.19) | 8.34E-01 |
| SNP_DQB1_32740602 | T | 0.04608 | 0.0765 | 5.38E-06 | 0.5652 | 2.43E-03 | 1.85E-01 | 0.78(0.53-1.13) | 7.07E-01 | 2.85E-01 | 0.81(0.56-1.19) | 8.34E-01 |
| SNP_DQB1_32740605_G | P | 0.04608 | 0.0765 | 5.38E-06 | 0.5652 | 2.43E-03 | 1.85E-01 | 0.78(0.53-1.13) | 7.07E-01 | 2.85E-01 | 0.81(0.56-1.19) | 8.34E-01 |
| AA_DQB1_56_32740669 | L | 0.04608 | 0.0765 | 5.38E-06 | 0.5652 | 2.43E-03 | 1.85E-01 | 0.78(0.53-1.13) | 7.07E-01 | 2.85E-01 | 0.81(0.56-1.19) | 8.34E-01 |
| AA_DQB1_70_32740627_E | P | 0.04608 | 0.0765 | 5.38E-06 | 0.5652 | 2.43E-03 | 1.85E-01 | 0.78(0.53-1.13) | 7.07E-01 | 2.85E-01 | 0.81(0.56-1.19) | 8.34E-01 |
| SNP_DQB1_32740627 | T | 0.04608 | 0.0765 | 5.38E-06 | 0.5652 | 2.43E-03 | 1.85E-01 | 0.78(0.53-1.13) | 7.07E-01 | 2.85E-01 | 0.81(0.56-1.19) | 8.34E-01 |
| SNP_DQB1_32740650 | A | 0.04608 | 0.0765 | 5.38E-06 | 0.5652 | 2.43E-03 | 1.85E-01 | 0.78(0.53-1.13) | 7.07E-01 | 2.85E-01 | 0.81(0.56-1.19) | 8.34E-01 |
| AA_DQB1_71_32740624_D | P | 0.04608 | 0.0765 | 5.38E-06 | 0.5652 | 2.43E-03 | 1.85E-01 | 0.78(0.53-1.13) | 7.07E-01 | 2.85E-01 | 0.81(0.56-1.19) | 8.34E-01 |
| SNP_DQB1_32740669 | A | 0.04608 | 0.0765 | 5.38E-06 | 0.5652 | 2.43E-03 | 1.85E-01 | 0.78(0.53-1.13) | 7.07E-01 | 2.85E-01 | 0.81(0.56-1.19) | 8.34E-01 |
| SNP_DQB1_32740773_G | P | 0.04608 | 0.0765 | 5.38E-06 | 0.5652 | 2.43E-03 | 1.85E-01 | 0.78(0.53-1.13) | 7.07E-01 | 2.85E-01 | 0.81(0.56-1.19) | 8.34E-01 |
| rs117933222 | A | 0.04608 | 0.0765 | 5.38E-06 | 0.5652 | 2.43E-03 | 1.85E-01 | 0.78(0.53-1.13) | 7.07E-01 | 2.85E-01 | 0.81(0.56-1.19) | 8.34E-01 |
| rs114302555 | T | 0.04608 | 0.0765 | 5.38E-06 | 0.5652 | 2.43E-03 | 1.85E-01 | 0.78(0.53-1.13) | 7.07E-01 | 2.85E-01 | 0.81(0.56-1.19) | 8.34E-01 |
| rs115199957 | C | 0.04608 | 0.0765 | 5.38E-06 | 0.5652 | 2.43E-03 | 1.85E-01 | 0.78(0.53-1.13) | 7.07E-01 | 2.85E-01 | 0.81(0.56-1.19) | 8.34E-01 |
| rs116147199 | G | 0.04608 | 0.0765 | 5.38E-06 | 0.5652 | 2.43E-03 | 1.85E-01 | 0.78(0.53-1.13) | 7.07E-01 | 2.85E-01 | 0.81(0.56-1.19) | 8.34E-01 |
| rs114996593 | C | 0.04608 | 0.0765 | 5.38E-06 | 0.5652 | 2.43E-03 | 1.85E-01 | 0.78(0.53-1.13) | 7.07E-01 | 2.85E-01 | 0.81(0.56-1.19) | 8.34E-01 |
| rs114466112 | T | 0.04608 | 0.0765 | 5.38E-06 | 0.5652 | 2.43E-03 | 1.85E-01 | 0.78(0.53-1.13) | 7.07E-01 | 2.85E-01 | 0.81(0.56-1.19) | 8.34E-01 |
| rs115144571 | G | 0.04608 | 0.0765 | 5.38E-06 | 0.5652 | 2.43E-03 | 1.85E-01 | 0.78(0.53-1.13) | 7.07E-01 | 2.85E-01 | 0.81(0.56-1.19) | 8.34E-01 |
| rs115778092 | T | 0.04608 | 0.0765 | 5.38E-06 | 0.5652 | 2.43E-03 | 1.85E-01 | 0.78(0.53-1.13) | 7.07E-01 | 2.85E-01 | 0.81(0.56-1.19) | 8.34E-01 |
| rs116287158 | C | 0.04608 | 0.0765 | 5.38E-06 | 0.5652 | 2.43E-03 | 1.85E-01 | 0.78(0.53-1.13) | 7.07E-01 | 2.85E-01 | 0.81(0.56-1.19) | 8.34E-01 |
| rs114218404 | T | 0.04608 | 0.0765 | 5.38E-06 | 0.5652 | 2.43E-03 | 1.85E-01 | 0.78(0.53-1.13) | 7.07E-01 | 2.85E-01 | 0.81(0.56-1.19) | 8.34E-01 |
| rs115777056 | A | 0.04608 | 0.0765 | 5.38E-06 | 0.5652 | 2.43E-03 | 1.85E-01 | 0.78(0.53-1.13) | 7.07E-01 | 2.85E-01 | 0.81(0.56-1.19) | 8.34E-01 |
| rs114536897 | C | 0.04608 | 0.0765 | 5.38E-06 | 0.5652 | 2.43E-03 | 1.85E-01 | 0.78(0.53-1.13) | 7.07E-01 | 2.85E-01 | 0.81(0.56-1.19) | 8.34E-01 |
| rs116511602 | T | 0.04608 | 0.0765 | 5.38E-06 | 0.5652 | 2.43E-03 | 1.85E-01 | 0.78(0.53-1.13) | 7.07E-01 | 2.85E-01 | 0.81(0.56-1.19) | 8.34E-01 |
| rs114492986 | A | 0.04608 | 0.0765 | 5.38E-06 | 0.5652 | 2.43E-03 | 1.85E-01 | 0.78(0.53-1.13) | 7.07E-01 | 2.85E-01 | 0.81(0.56-1.19) | 8.34E-01 |
| rs116476267 | A | 0.04608 | 0.0765 | 5.38E-06 | 0.5652 | 2.43E-03 | 1.85E-01 | 0.78(0.53-1.13) | 7.07E-01 | 2.85E-01 | 0.81(0.56-1.19) | 8.34E-01 |
| rs115842332 | A | 0.04608 | 0.0765 | 5.38E-06 | 0.5652 | 2.43E-03 | 1.85E-01 | 0.78(0.53-1.13) | 7.07E-01 | 2.85E-01 | 0.81(0.56-1.19) | 8.34E-01 |
| rs114325417 | A | 0.04608 | 0.0765 | 5.38E-06 | 0.5652 | 2.43E-03 | 1.85E-01 | 0.78(0.53-1.13) | 7.07E-01 | 2.85E-01 | 0.81(0.56-1.19) | 8.34E-01 |
| rs115262684 | A | 0.04608 | 0.0765 | 5.38E-06 | 0.5652 | 2.43E-03 | 1.85E-01 | 0.78(0.53-1.13) | 7.07E-01 | 2.85E-01 | 0.81(0.56-1.19) | 8.34E-01 |
| rs116459302 | T | 0.04608 | 0.0765 | 5.38E-06 | 0.5652 | 2.43E-03 | 1.85E-01 | 0.78(0.53-1.13) | 7.07E-01 | 2.85E-01 | 0.81(0.56-1.19) | 8.34E-01 |
| rs115848735 | T | 0.04608 | 0.0765 | 5.38E-06 | 0.5652 | 2.43E-03 | 1.85E-01 | 0.78(0.53-1.13) | 7.07E-01 | 2.85E-01 | 0.81(0.56-1.19) | 8.34E-01 |
| rs114357491 | A | 0.04651 | 0.0765 | 7.09E-06 | 0.5702 | 3.11E-03 | 2.17E-01 | 0.79(0.54-1.15) | 7.45E-01 | 3.19E-01 | 0.83(0.57-1.2) | 8.62E-01 |
| AA_DQB1_9_32740810_F | P | 0.08656 | 0.1231 | 1.06E-05 | 0.6537 | 4.50E-03 | 3.98E-02 | 0.79(0.63-0.99) | 4.75E-01 | 6.20E-02 | 0.81(0.64-1.01) | 5.53E-01 |
| AA_DRB1_13_32660109_H | P | 0.08183 | 0.1183 | 1.96E-05 | 0.6575 | 5.98E-03 | 9.05E-01 | 1.03(0.68-1.54) | 9.99E-01 | 9.74E-01 | 0.99(0.66-1.49) | 9.98E-01 |
| AA_DRB1_180_32657338_L | P | 0.08183 | 0.1183 | 1.96E-05 | 0.6575 | 5.98E-03 | 9.05E-01 | 1.03(0.68-1.54) | 9.99E-01 | 9.74E-01 | 0.99(0.66-1.49) | 9.98E-01 |
| SNP_DRB1_32657339 | G | 0.08183 | 0.1183 | 1.96E-05 | 0.6575 | 5.98E-03 | 9.05E-01 | 1.03(0.68-1.54) | 9.99E-01 | 9.74E-01 | 0.99(0.66-1.49) | 9.98E-01 |
| AA_DRB1_180_32657338_V | A | 0.08183 | 0.1183 | 1.96E-05 | 0.6575 | 5.98E-03 | 9.05E-01 | 1.03(0.68-1.54) | 9.99E-01 | 9.74E-01 | 0.99(0.66-1.49) | 9.98E-01 |
| SNP_DRB1_32657591_A | P | 0.08183 | 0.1183 | 1.96E-05 | 0.6575 | 5.98E-03 | 9.05E-01 | 1.03(0.68-1.54) | 9.99E-01 | 9.74E-01 | 0.99(0.66-1.49) | 9.98E-01 |
| HLA_DRB1_04 | P | 0.08183 | 0.1183 | 1.96E-05 | 0.6575 | 5.98E-03 | 9.05E-01 | 1.03(0.68-1.54) | 9.99E-01 | 9.74E-01 | 0.99(0.66-1.49) | 9.98E-01 |
| AA_DRB1_-24_32665481_F | P | 0.08183 | 0.1183 | 1.96E-05 | 0.6575 | 5.98E-03 | 9.05E-01 | 1.03(0.68-1.54) | 9.99E-01 | 9.74E-01 | 0.99(0.66-1.49) | 9.98E-01 |
| SNP_DRB1_32660050 | G | 0.08183 | 0.1183 | 1.96E-05 | 0.6575 | 5.98E-03 | 9.05E-01 | 1.03(0.68-1.54) | 9.99E-01 | 9.74E-01 | 0.99(0.66-1.49) | 9.98E-01 |
| AA_DRB1_-24_32665481_L | A | 0.08183 | 0.1183 | 1.96E-05 | 0.6575 | 5.98E-03 | 9.05E-01 | 1.03(0.68-1.54) | 9.99E-01 | 9.74E-01 | 0.99(0.66-1.49) | 9.98E-01 |
| SNP_DRB1_32660110_G | P | 0.08183 | 0.1183 | 1.96E-05 | 0.6575 | 5.98E-03 | 9.05E-01 | 1.03(0.68-1.54) | 9.99E-01 | 9.74E-01 | 0.99(0.66-1.49) | 9.98E-01 |
| SNP_DRB1_32660111 | T | 0.08183 | 0.1183 | 1.96E-05 | 0.6575 | 5.98E-03 | 9.05E-01 | 1.03(0.68-1.54) | 9.99E-01 | 9.74E-01 | 0.99(0.66-1.49) | 9.98E-01 |
| AA_DRB1_33_32660049 | H | 0.08183 | 0.1183 | 1.96E-05 | 0.6575 | 5.98E-03 | 9.05E-01 | 1.03(0.68-1.54) | 9.99E-01 | 9.74E-01 | 0.99(0.66-1.49) | 9.98E-01 |
| AA_DRB1_96_32657590_Y | P | 0.08183 | 0.1183 | 1.96E-05 | 0.6575 | 5.98E-03 | 9.05E-01 | 1.03(0.68-1.54) | 9.99E-01 | 9.74E-01 | 0.99(0.66-1.49) | 9.98E-01 |
| SNP_DRB1_32665482 | A | 0.08183 | 0.1183 | 1.96E-05 | 0.6575 | 5.98E-03 | 9.05E-01 | 1.03(0.68-1.54) | 9.99E-01 | 9.74E-01 | 0.99(0.66-1.49) | 9.98E-01 |
| rs115577932 | T | 0.04608 | 0.07391 | 2.76E-05 | 0.5878 | 8.23E-03 | 4.13E-01 | 0.86(0.59-1.24) | 8.71E-01 | 5.55E-01 | 0.89(0.61-1.3) | 9.51E-01 |
| rs114096659 | G | 0.06589 | 0.09867 | 3.63E-05 | 0.6384 | 1.02E-02 | 2.11E-01 | 0.84(0.63-1.11) | 7.35E-01 | 2.38E-01 | 0.85(0.64-1.12) | 8.09E-01 |
| rs114709572 | G | 0.06589 | 0.09867 | 3.63E-05 | 0.6384 | 1.02E-02 | 2.11E-01 | 0.84(0.63-1.11) | 7.35E-01 | 2.38E-01 | 0.85(0.64-1.12) | 8.09E-01 |
| rs116642851 | T | 0.06589 | 0.09867 | 3.63E-05 | 0.6384 | 1.02E-02 | 2.11E-01 | 0.84(0.63-1.11) | 7.35E-01 | 2.38E-01 | 0.85(0.64-1.12) | 8.09E-01 |
| rs115872036 | G | 0.1245 | 0.1608 | 8.24E-05 | 0.721 | 2.20E-02 | 3.35E-02 | 0.82(0.69-0.99) | 4.67E-01 | 5.91E-02 | 0.84(0.7-1.01) | 5.51E-01 |
| rs116279025 | T | 0.1245 | 0.1608 | 8.24E-05 | 0.721 | 2.20E-02 | 3.35E-02 | 0.82(0.69-0.99) | 4.67E-01 | 5.91E-02 | 0.84(0.7-1.01) | 5.51E-01 |
| rs114893192 | A | 0.1245 | 0.1608 | 8.24E-05 | 0.721 | 2.20E-02 | 3.35E-02 | 0.82(0.69-0.99) | 4.67E-01 | 5.91E-02 | 0.84(0.7-1.01) | 5.51E-01 |
| rs115126566 | A | 0.2834 | 0.2339 | 9.04E-05 | 1.294 | 2.37E-02 | 9.56E-05 | 1.3(1.14-1.47) | 1.77E-01 | NAg | NAg | NAg |
| rs116385426 | A | 0.1232 | 0.1582 | 1.01E-04 | 0.7232 | 2.59E-02 | 3.96E-02 | 0.83(0.69-0.99) | 4.75E-01 | 6.65E-02 | 0.85(0.71-1.01) | 5.60E-01 |
| rs114440866 | G | 0.2834 | 0.2347 | 1.15E-04 | 1.289 | 2.87E-02 | 1.23E-04 | 1.29(1.13-1.47) | 1.77E-01 | NAg | NAg | NAg |
| rs116477415 | G | 0.2834 | 0.2347 | 1.18E-04 | 1.288 | 2.87E-02 | 1.22E-04 | 1.29(1.13-1.47) | 1.77E-01 | 8.14E-01 | 0.88(0.31-2.5) | 9.93E-01 |
| rs115025153 | A | 0.2149 | 0.167 | 1.21E-04 | 1.326 | 2.87E-02 | 1.58E-04 | 1.32(1.14-1.53) | 1.77E-01 | 1.52E-04 | 1.32(1.15-1.53) | 4.38E-01 |
| rs114827547 | C | 0.2149 | 0.167 | 1.21E-04 | 1.326 | 2.87E-02 | 1.58E-04 | 1.32(1.14-1.53) | 1.77E-01 | 1.52E-04 | 1.32(1.15-1.53) | 4.38E-01 |
| rs114319085 | G | 0.3411 | 0.3888 | 1.27E-04 | 0.7932 | 2.87E-02 | 1.00E-04 | 0.79(0.7-0.89) | 1.77E-01 | 1.20E-04 | 0.79(0.7-0.89) | 4.38E-01 |
| rs117876414 | A | 0.04393 | 0.06874 | 1.37E-04 | 0.6114 | 2.87E-02 | 6.91E-01 | 0.93(0.64-1.34) | 9.75E-01 | 9.01E-01 | 0.98(0.68-1.41) | 9.98E-01 |
| rs114949182 | G | 0.289 | 0.2398 | 1.39E-04 | 1.28 | 2.87E-02 | 1.38E-04 | 1.28(1.13-1.46) | 1.77E-01 | 8.45E-01 | 0.93(0.44-1.96) | 9.95E-01 |
| rs115560161 | A | 0.2838 | 0.2358 | 1.51E-04 | 1.283 | 2.87E-02 | 1.66E-04 | 1.28(1.13-1.46) | 1.77E-01 | 1.59E-01 | 0.21(0.02-1.83) | 7.36E-01 |
| rs115094754 | T | 0.2838 | 0.2358 | 1.51E-04 | 1.283 | 2.87E-02 | 1.66E-04 | 1.28(1.13-1.46) | 1.77E-01 | 1.59E-01 | 0.21(0.02-1.83) | 7.36E-01 |
| rs116517979 | C | 0.2868 | 0.2391 | 1.66E-04 | 1.28 | 2.87E-02 | 2.04E-04 | 1.28(1.12-1.45) | 1.77E-01 | 3.84E-01 | 0.69(0.3-1.58) | 8.90E-01 |
| AA_DRB1_11_32660115_V | P | 0.08613 | 0.1186 | 1.69E-04 | 0.6952 | 2.87E-02 | 2.68E-01 | 1.25(0.84-1.85) | 7.60E-01 | 3.25E-01 | 1.22(0.82-1.81) | 8.68E-01 |
| AA_DRB1_120_32657518_N | P | 0.08613 | 0.1186 | 1.69E-04 | 0.6952 | 2.87E-02 | 2.68E-01 | 1.25(0.84-1.85) | 7.60E-01 | 3.25E-01 | 1.22(0.82-1.81) | 8.68E-01 |
| SNP_DRB1_32657518 | T | 0.08613 | 0.1186 | 1.69E-04 | 0.6952 | 2.87E-02 | 2.68E-01 | 1.25(0.84-1.85) | 7.60E-01 | 3.25E-01 | 1.22(0.82-1.81) | 8.68E-01 |
| AA_DRB1_120_32657518_S | A | 0.08613 | 0.1186 | 1.69E-04 | 0.6952 | 2.87E-02 | 2.68E-01 | 1.25(0.84-1.85) | 7.60E-01 | 3.25E-01 | 1.22(0.82-1.81) | 8.68E-01 |
| rs114239502 | C | 0.2851 | 0.2376 | 1.69E-04 | 1.28 | 2.87E-02 | 1.78E-04 | 1.28(1.13-1.46) | 1.77E-01 | 3.17E-01 | 0.55(0.17-1.78) | 8.61E-01 |
| rs114333446 | T | 0.2847 | 0.2373 | 1.69E-04 | 1.281 | 2.87E-02 | 1.76E-04 | 1.28(1.13-1.46) | 1.77E-01 | 2.78E-01 | 0.48(0.13-1.81) | 8.28E-01 |
| rs114412612 | C | 0.2847 | 0.2373 | 1.69E-04 | 1.281 | 2.87E-02 | 1.76E-04 | 1.28(1.13-1.46) | 1.77E-01 | 2.78E-01 | 0.48(0.13-1.81) | 8.28E-01 |
| HLA_DQB1_0401 | P | 0.04091 | 0.0643 | 1.70E-04 | 0.6067 | 2.87E-02 | 6.54E-01 | 0.92(0.64-1.33) | 9.75E-01 | 8.23E-01 | 0.96(0.66-1.39) | 9.93E-01 |
| AA_DQB1_23_32740768 | L | 0.04091 | 0.0643 | 1.70E-04 | 0.6067 | 2.87E-02 | 6.54E-01 | 0.92(0.64-1.33) | 9.75E-01 | 8.23E-01 | 0.96(0.66-1.39) | 9.93E-01 |
| SNP_DQB1_32740768 | A | 0.04091 | 0.0643 | 1.70E-04 | 0.6067 | 2.87E-02 | 6.54E-01 | 0.92(0.64-1.33) | 9.75E-01 | 8.23E-01 | 0.96(0.66-1.39) | 9.93E-01 |
| AA_DQB1_-6_32742283_A | P | 0.04091 | 0.0643 | 1.70E-04 | 0.6067 | 2.87E-02 | 6.54E-01 | 0.92(0.64-1.33) | 9.75E-01 | 8.23E-01 | 0.96(0.66-1.39) | 9.93E-01 |
| SNP_DQB1_32742284_C | P | 0.04091 | 0.0643 | 1.70E-04 | 0.6067 | 2.87E-02 | 6.54E-01 | 0.92(0.64-1.33) | 9.75E-01 | 8.23E-01 | 0.96(0.66-1.39) | 9.93E-01 |
| rs114688198 | C | 0.1438 | 0.1796 | 1.72E-04 | 0.7429 | 2.87E-02 | 3.62E-02 | 0.84(0.71-0.99) | 4.74E-01 | 4.02E-02 | 0.84(0.71-0.99) | 5.09E-01 |
| rs115314404 | C | 0.1438 | 0.1796 | 1.72E-04 | 0.7429 | 2.87E-02 | 3.62E-02 | 0.84(0.71-0.99) | 4.74E-01 | 4.02E-02 | 0.84(0.71-0.99) | 5.09E-01 |
| rs115381490 | G | 0.1438 | 0.1796 | 1.72E-04 | 0.7429 | 2.87E-02 | 3.62E-02 | 0.84(0.71-0.99) | 4.74E-01 | 4.02E-02 | 0.84(0.71-0.99) | 5.09E-01 |
| rs116069359 | C | 0.1438 | 0.1796 | 1.72E-04 | 0.7429 | 2.87E-02 | 3.62E-02 | 0.84(0.71-0.99) | 4.74E-01 | 4.02E-02 | 0.84(0.71-0.99) | 5.09E-01 |
| rs114558852 | A | 0.1438 | 0.1796 | 1.72E-04 | 0.7429 | 2.87E-02 | 3.62E-02 | 0.84(0.71-0.99) | 4.74E-01 | 4.02E-02 | 0.84(0.71-0.99) | 5.09E-01 |
| rs113878812 | G | 0.1438 | 0.1796 | 1.72E-04 | 0.7429 | 2.87E-02 | 3.62E-02 | 0.84(0.71-0.99) | 4.74E-01 | 4.02E-02 | 0.84(0.71-0.99) | 5.09E-01 |
| rs115702307 | A | 0.1438 | 0.1796 | 1.72E-04 | 0.7429 | 2.87E-02 | 3.62E-02 | 0.84(0.71-0.99) | 4.74E-01 | 4.02E-02 | 0.84(0.71-0.99) | 5.09E-01 |
| rs114308205 | G | 0.1438 | 0.1796 | 1.72E-04 | 0.7429 | 2.87E-02 | 3.62E-02 | 0.84(0.71-0.99) | 4.74E-01 | 4.02E-02 | 0.84(0.71-0.99) | 5.09E-01 |
| rs116375859 | A | 0.1438 | 0.1796 | 1.72E-04 | 0.7429 | 2.87E-02 | 3.62E-02 | 0.84(0.71-0.99) | 4.74E-01 | 4.02E-02 | 0.84(0.71-0.99) | 5.09E-01 |
| rs116060526 | G | 0.1382 | 0.1729 | 1.73E-04 | 0.7403 | 2.87E-02 | 4.04E-02 | 0.84(0.71-0.99) | 4.76E-01 | 5.03E-02 | 0.84(0.71-1) | 5.21E-01 |
| rs115066201 | T | 0.286 | 0.2384 | 1.84E-04 | 1.277 | 3.02E-02 | 1.92E-04 | 1.28(1.12-1.45) | 1.77E-01 | 3.26E-01 | 0.61(0.22-1.65) | 8.68E-01 |
| HLA_DQA1_0303 | P | 0.0491 | 0.07428 | 2.04E-04 | 0.6318 | 3.25E-02 | 4.29E-01 | 0.88(0.64-1.21) | 8.80E-01 | 4.75E-01 | 0.89(0.65-1.22) | 9.36E-01 |
| rs116574405 | C | 0.2851 | 0.238 | 2.05E-04 | 1.276 | 3.25E-02 | 2.17E-04 | 1.28(1.12-1.45) | 1.77E-01 | 1.79E-01 | 0.45(0.14-1.45) | 7.47E-01 |
| rs115994864 | A | 0.3187 | 0.269 | 2.05E-04 | 1.265 | 3.25E-02 | 2.17E-04 | 1.27(1.12-1.43) | 1.77E-01 | 7.82E-01 | 1.05(0.76-1.44) | 9.93E-01 |
| rs114932242 | T | 0.2847 | 0.238 | 2.13E-04 | 1.276 | 3.32E-02 | 2.25E-04 | 1.28(1.12-1.45) | 1.77E-01 | 1.47E-01 | 0.38(0.1-1.4) | 7.33E-01 |
| rs115826300 | C | 0.2847 | 0.238 | 2.13E-04 | 1.276 | 3.32E-02 | 2.25E-04 | 1.28(1.12-1.45) | 1.77E-01 | 1.47E-01 | 0.38(0.1-1.4) | 7.33E-01 |
| rs115460399 | T | 0.1003 | 0.1338 | 2.46E-04 | 0.716 | 3.68E-02 | 1.64E-02 | 1.8(1.11-2.92) | 4.59E-01 | 4.00E-02 | 1.66(1.02-2.7) | 5.09E-01 |
| 32776645 | G | 0.1003 | 0.1338 | 2.46E-04 | 0.716 | 3.68E-02 | 1.64E-02 | 1.8(1.11-2.92) | 4.59E-01 | 4.00E-02 | 1.66(1.02-2.7) | 5.09E-01 |
| rs114062614 | G | 0.1003 | 0.1338 | 2.46E-04 | 0.716 | 3.68E-02 | 1.64E-02 | 1.8(1.11-2.92) | 4.59E-01 | 4.00E-02 | 1.66(1.02-2.7) | 5.09E-01 |
| AA_DRB1_96_32657590_H | A | 0.1783 | 0.2195 | 2.46E-04 | 0.7657 | 3.68E-02 | 3.28E-01 | 0.92(0.77-1.09) | 8.19E-01 | 2.54E-01 | 0.9(0.76-1.08) | 8.10E-01 |
| rs114339108 | T | 0.2601 | 0.2143 | 2.70E-04 | 1.278 | 3.83E-02 | 2.15E-04 | 1.28(1.13-1.47) | 1.77E-01 | 9.45E-01 | 1.01(0.68-1.51) | 9.98E-01 |
| AA_B_66_31432518_I | A | 0.2498 | 0.2069 | 2.74E-04 | 1.286 | 3.83E-02 | 3.69E-03 | 1.23(1.07-1.41) | 4.33E-01 | 6.66E-03 | 1.21(1.05-1.39) | 4.38E-01 |
| SNP_B_31432518 | T | 0.2498 | 0.2069 | 2.74E-04 | 1.286 | 3.83E-02 | 3.69E-03 | 1.23(1.07-1.41) | 4.33E-01 | 6.66E-03 | 1.21(1.05-1.39) | 4.38E-01 |
| rs114683640 | G | 0.1003 | 0.1334 | 2.97E-04 | 0.7187 | 3.83E-02 | 1.09E-02 | 1.88(1.16-3.06) | 4.33E-01 | 2.82E-02 | 1.73(1.06-2.83) | 5.07E-01 |
| rs114119601 | A | 0.1003 | 0.1334 | 2.97E-04 | 0.7187 | 3.83E-02 | 1.09E-02 | 1.88(1.16-3.06) | 4.33E-01 | 2.82E-02 | 1.73(1.06-2.83) | 5.07E-01 |
| rs115901583 | G | 0.1003 | 0.1334 | 2.97E-04 | 0.7187 | 3.83E-02 | 1.09E-02 | 1.88(1.16-3.06) | 4.33E-01 | 2.82E-02 | 1.73(1.06-2.83) | 5.07E-01 |
| rs114952213 | A | 0.1003 | 0.1334 | 2.97E-04 | 0.7187 | 3.83E-02 | 1.09E-02 | 1.88(1.16-3.06) | 4.33E-01 | 2.82E-02 | 1.73(1.06-2.83) | 5.07E-01 |
| rs114460725 | A | 0.1003 | 0.1334 | 2.97E-04 | 0.7187 | 3.83E-02 | 1.09E-02 | 1.88(1.16-3.06) | 4.33E-01 | 2.82E-02 | 1.73(1.06-2.83) | 5.07E-01 |
| rs116823425 | T | 0.1003 | 0.1334 | 2.97E-04 | 0.7187 | 3.83E-02 | 1.09E-02 | 1.88(1.16-3.06) | 4.33E-01 | 2.82E-02 | 1.73(1.06-2.83) | 5.07E-01 |
| rs114902856 | T | 0.1003 | 0.1334 | 2.97E-04 | 0.7187 | 3.83E-02 | 1.09E-02 | 1.88(1.16-3.06) | 4.33E-01 | 2.82E-02 | 1.73(1.06-2.83) | 5.07E-01 |
| rs116666187 | G | 0.1003 | 0.1334 | 2.97E-04 | 0.7187 | 3.83E-02 | 1.09E-02 | 1.88(1.16-3.06) | 4.33E-01 | 2.82E-02 | 1.73(1.06-2.83) | 5.07E-01 |
| rs114895118 | T | 0.1003 | 0.1334 | 2.97E-04 | 0.7187 | 3.83E-02 | 1.09E-02 | 1.88(1.16-3.06) | 4.33E-01 | 2.82E-02 | 1.73(1.06-2.83) | 5.07E-01 |
| rs114554853 | T | 0.1003 | 0.1334 | 2.97E-04 | 0.7187 | 3.83E-02 | 1.09E-02 | 1.88(1.16-3.06) | 4.33E-01 | 2.82E-02 | 1.73(1.06-2.83) | 5.07E-01 |
| rs115460664 | A | 0.1003 | 0.1334 | 2.97E-04 | 0.7187 | 3.83E-02 | 1.09E-02 | 1.88(1.16-3.06) | 4.33E-01 | 2.82E-02 | 1.73(1.06-2.83) | 5.07E-01 |
| rs116213560 | A | 0.1003 | 0.1334 | 2.97E-04 | 0.7187 | 3.83E-02 | 1.09E-02 | 1.88(1.16-3.06) | 4.33E-01 | 2.82E-02 | 1.73(1.06-2.83) | 5.07E-01 |
| rs115724353 | T | 0.1003 | 0.1334 | 2.97E-04 | 0.7187 | 3.83E-02 | 1.09E-02 | 1.88(1.16-3.06) | 4.33E-01 | 2.82E-02 | 1.73(1.06-2.83) | 5.07E-01 |
| rs115718294 | T | 0.3191 | 0.2716 | 3.19E-04 | 1.256 | 4.07E-02 | 3.34E-04 | 1.26(1.11-1.42) | 2.08E-01 | 9.72E-01 | 1.01(0.74-1.37) | 9.98E-01 |
| rs117927189 | C | 0.1314 | 0.1013 | 3.52E-04 | 1.383 | 4.37E-02 | 1.20E-03 | 1.34(1.12-1.61) | 4.33E-01 | 6.65E-04 | 1.37(1.14-1.63) | 4.38E-01 |
| rs116121300 | T | 0.32 | 0.2724 | 3.60E-04 | 1.253 | 4.37E-02 | 3.75E-04 | 1.25(1.11-1.42) | 2.08E-01 | 9.75E-01 | 1(0.73-1.35) | 9.98E-01 |
| rs116575364 | C | 0.32 | 0.2724 | 3.60E-04 | 1.253 | 4.37E-02 | 3.75E-04 | 1.25(1.11-1.42) | 2.08E-01 | 9.75E-01 | 1(0.73-1.35) | 9.98E-01 |
| rs115995475 | A | 0.32 | 0.2724 | 3.60E-04 | 1.253 | 4.37E-02 | 3.75E-04 | 1.25(1.11-1.42) | 2.08E-01 | 9.75E-01 | 1(0.73-1.35) | 9.98E-01 |
| rs114487713 | G | 0.32 | 0.2724 | 3.60E-04 | 1.253 | 4.37E-02 | 3.75E-04 | 1.25(1.11-1.42) | 2.08E-01 | 9.75E-01 | 1(0.73-1.35) | 9.98E-01 |
| rs115041128 | G | 0.32 | 0.2724 | 3.60E-04 | 1.253 | 4.37E-02 | 3.75E-04 | 1.25(1.11-1.42) | 2.08E-01 | 9.75E-01 | 1(0.73-1.35) | 9.98E-01 |
| rs117244333 | A | 0.1473 | 0.1131 | 3.66E-04 | 1.361 | 4.41E-02 | 1.78E-03 | 1.31(1.11-1.56) | 4.33E-01 | 8.03E-04 | 1.34(1.13-1.59) | 4.38E-01 |
| rs115519353 | C | 0.3187 | 0.2716 | 3.75E-04 | 1.253 | 4.48E-02 | 4.02E-04 | 1.25(1.11-1.42) | 2.14E-01 | 9.28E-01 | 0.99(0.72-1.35) | 9.98E-01 |
| rs116317631 | G | 0.3221 | 0.2746 | 3.98E-04 | 1.25 | 4.71E-02 | 4.29E-04 | 1.25(1.1-1.41) | 2.21E-01 | 9.36E-01 | 0.99(0.73-1.33) | 9.98E-01 |
| SNP_DRB1_32656559 | G | 0.09388 | 0.1253 | 4.11E-04 | 0.7175 | 4.80E-02 | 2.70E-01 | 1.21(0.86-1.7) | 7.61E-01 | 4.15E-01 | 1.15(0.82-1.62) | 9.19E-01 |
| SNP_DRB1_32657591_G | A | 0.09388 | 0.1253 | 4.11E-04 | 0.7175 | 4.80E-02 | 2.70E-01 | 1.21(0.86-1.7) | 7.61E-01 | 4.15E-01 | 1.15(0.82-1.62) | 9.19E-01 |
| rs115610792 | T | 0.1098 | 0.1423 | 4.44E-04 | 0.7416 | 5.12E-02 | 3.75E-04 | 0.74(0.62-0.87) | 2.08E-01 | 4.04E-04 | 0.74(0.62-0.87) | 4.38E-01 |
| HLA_DRB1_0405 | P | 0.04091 | 0.06208 | 4.46E-04 | 0.6251 | 5.12E-02 | 9.08E-01 | 0.98(0.68-1.41) | 9.99E-01 | 9.07E-01 | 1.02(0.71-1.48) | 9.98E-01 |
| rs117521348 | T | 0.1352 | 0.105 | 4.57E-04 | 1.367 | 5.20E-02 | 1.53E-03 | 1.33(1.12-1.59) | 4.33E-01 | 9.02E-04 | 1.35(1.13-1.61) | 4.38E-01 |
| rs114969715 | A | 0.1473 | 0.1138 | 4.68E-04 | 1.353 | 5.29E-02 | 2.31E-03 | 1.3(1.1-1.55) | 4.33E-01 | 1.00E-03 | 1.33(1.12-1.58) | 4.38E-01 |
| rs117085235 | C | 0.1314 | 0.1027 | 4.89E-04 | 1.372 | 5.49E-02 | 1.88E-03 | 1.33(1.11-1.59) | 4.33E-01 | 1.11E-03 | 1.35(1.13-1.61) | 4.38E-01 |
| rs116190638 | C | 0.3333 | 0.3799 | 5.34E-04 | 0.8113 | 5.95E-02 | 1.06E-02 | 0.85(0.76-0.96) | 4.33E-01 | 1.77E-02 | 0.86(0.76-0.97) | 5.07E-01 |
| rs114267438 | T | 0.3118 | 0.3555 | 5.47E-04 | 0.8081 | 6.05E-02 | 1.75E-03 | 0.82(0.73-0.93) | 4.33E-01 | 3.51E-03 | 0.83(0.74-0.94) | 4.38E-01 |
| rs115250945 | C | 0.3114 | 0.3551 | 5.57E-04 | 0.8084 | 6.12E-02 | 1.79E-03 | 0.82(0.73-0.93) | 4.33E-01 | 3.55E-03 | 0.83(0.74-0.94) | 4.38E-01 |
| rs114425952 | A | 0.1658 | 0.1988 | 5.62E-04 | 0.7714 | 6.12E-02 | 5.68E-02 | 0.86(0.73-1) | 5.50E-01 | 6.15E-02 | 0.86(0.74-1.01) | 5.53E-01 |
| rs116071701 | T | 0.332 | 0.3784 | 6.02E-04 | 0.8129 | 6.46E-02 | 1.20E-02 | 0.86(0.76-0.97) | 4.38E-01 | 2.04E-02 | 0.87(0.77-0.98) | 5.07E-01 |
| rs114191100 | T | 0.3105 | 0.354 | 6.10E-04 | 0.8093 | 6.46E-02 | 2.00E-03 | 0.83(0.73-0.93) | 4.33E-01 | 4.10E-03 | 0.84(0.74-0.94) | 4.38E-01 |
| rs116439143 | A | 0.3105 | 0.354 | 6.10E-04 | 0.8093 | 6.46E-02 | 2.00E-03 | 0.83(0.73-0.93) | 4.33E-01 | 4.10E-03 | 0.84(0.74-0.94) | 4.38E-01 |
| rs115819871 | A | 0.3105 | 0.354 | 6.10E-04 | 0.8093 | 6.46E-02 | 2.00E-03 | 0.83(0.73-0.93) | 4.33E-01 | 4.10E-03 | 0.84(0.74-0.94) | 4.38E-01 |
| rs114847085 | A | 0.3118 | 0.3551 | 6.27E-04 | 0.81 | 6.59E-02 | 1.99E-03 | 0.83(0.73-0.93) | 4.33E-01 | 3.95E-03 | 0.84(0.74-0.94) | 4.38E-01 |
| rs115244820 | T | 0.3338 | 0.2919 | 6.49E-04 | 1.234 | 6.78E-02 | 1.49E-03 | 1.22(1.08-1.38) | 4.33E-01 | 1.14E-03 | 1.22(1.08-1.38) | 4.38E-01 |
| rs114390910 | T | 0.09733 | 0.07317 | 6.63E-04 | 1.429 | 6.87E-02 | 2.35E-03 | 1.38(1.12-1.69) | 4.33E-01 | 1.70E-03 | 1.39(1.13-1.71) | 4.38E-01 |
| rs114702177 | C | 0.1619 | 0.1341 | 6.77E-04 | 1.327 | 6.97E-02 | 5.28E-03 | 1.26(1.07-1.49) | 4.33E-01 | 1.07E-02 | 1.24(1.05-1.46) | 4.61E-01 |
| rs115384004 | G | 0.3122 | 0.3551 | 6.88E-04 | 0.8113 | 7.04E-02 | 2.16E-03 | 0.83(0.73-0.93) | 4.33E-01 | 4.24E-03 | 0.84(0.74-0.95) | 4.38E-01 |
| AA_C_95_31347092_I | P | 0.2382 | 0.2775 | 7.18E-04 | 0.7977 | 7.24E-02 | 7.22E-04 | 0.8(0.7-0.91) | 3.13E-01 | 1.22E-03 | 0.8(0.7-0.92) | 4.38E-01 |
| SNP_C_31347093_T | P | 0.2382 | 0.2775 | 7.18E-04 | 0.7977 | 7.24E-02 | 7.22E-04 | 0.8(0.7-0.91) | 3.13E-01 | 1.22E-03 | 0.8(0.7-0.92) | 4.38E-01 |
| rs116777825 | T | 0.2821 | 0.3245 | 7.24E-04 | 0.8083 | 7.26E-02 | 2.61E-03 | 0.83(0.73-0.94) | 4.33E-01 | 5.06E-03 | 0.84(0.74-0.95) | 4.38E-01 |
| AA_C_95_31347092_L | A | 0.245 | 0.2842 | 8.15E-04 | 0.8006 | 8.06E-02 | 7.35E-04 | 0.8(0.7-0.91) | 3.13E-01 | 1.24E-03 | 0.81(0.71-0.92) | 4.38E-01 |
| SNP_C_31347093_G | A | 0.245 | 0.2842 | 8.15E-04 | 0.8006 | 8.06E-02 | 7.35E-04 | 0.8(0.7-0.91) | 3.13E-01 | 1.24E-03 | 0.81(0.71-0.92) | 4.38E-01 |
| rs116832290 | A | 0.2666 | 0.3045 | 8.28E-04 | 0.8078 | 8.08E-02 | 6.81E-04 | 0.8(0.71-0.91) | 3.13E-01 | 7.78E-04 | 0.81(0.71-0.91) | 4.38E-01 |
| rs114285039 | T | 0.3307 | 0.2901 | 8.29E-04 | 1.23 | 8.08E-02 | 1.98E-03 | 1.21(1.07-1.37) | 4.33E-01 | 2.01E-03 | 1.21(1.07-1.37) | 4.38E-01 |
| rs117416277 | C | 0.1305 | 0.1035 | 8.98E-04 | 1.35 | 8.70E-02 | 2.65E-03 | 1.31(1.1-1.57) | 4.33E-01 | 1.57E-03 | 1.33(1.12-1.6) | 4.38E-01 |
| SNP_DRB1_32660109_T | P | 0.1301 | 0.1608 | 9.08E-04 | 0.7593 | 8.75E-02 | 7.80E-01 | 1.03(0.82-1.3) | 9.94E-01 | 7.96E-01 | 1.03(0.82-1.3) | 9.93E-01 |
| rs114394153 | A | 0.3359 | 0.3803 | 9.85E-04 | 0.8205 | 9.42E-02 | 1.69E-02 | 0.86(0.77-0.97) | 4.59E-01 | 2.76E-02 | 0.87(0.77-0.99) | 5.07E-01 |
| rs115316774 | C | 0.1714 | 0.1452 | 1.03E-03 | 1.304 | 9.81E-02 | 1.03E-02 | 1.23(1.05-1.45) | 4.33E-01 | 1.53E-02 | 1.22(1.04-1.43) | 5.07E-01 |
| rs115688699 | T | 0.2515 | 0.2927 | 1.22E-03 | 0.8104 | 1.10E-01 | 4.34E-03 | 0.83(0.73-0.94) | 4.33E-01 | 7.55E-03 | 0.84(0.74-0.95) | 4.38E-01 |
| rs114936958 | C | 0.2515 | 0.2927 | 1.22E-03 | 0.8104 | 1.10E-01 | 4.34E-03 | 0.83(0.73-0.94) | 4.33E-01 | 7.55E-03 | 0.84(0.74-0.95) | 4.38E-01 |
| rs112115374 | G | 0.4798 | 0.514 | 1.22E-03 | 0.8283 | 1.10E-01 | 5.30E-02 | 0.89(0.79-1) | 5.34E-01 | 5.07E-02 | 0.89(0.79-1) | 5.21E-01 |
| rs116258752 | C | 0.4466 | 0.401 | 1.25E-03 | 1.21 | 1.10E-01 | 6.46E-03 | 1.18(1.05-1.32) | 4.33E-01 | 9.53E-03 | 1.17(1.04-1.31) | 4.42E-01 |
| 31428548 | T | 0.05168 | 0.07206 | 1.26E-03 | 0.6739 | 1.10E-01 | 2.12E-03 | 0.69(0.54-0.87) | 4.33E-01 | 2.47E-03 | 0.69(0.54-0.88) | 4.38E-01 |
| rs115260679 | G | 0.2597 | 0.2214 | 1.26E-03 | 1.247 | 1.10E-01 | 6.14E-03 | 1.21(1.06-1.38) | 4.33E-01 | 3.42E-03 | 1.23(1.07-1.4) | 4.38E-01 |
| rs116676460 | C | 0.2597 | 0.2214 | 1.26E-03 | 1.247 | 1.10E-01 | 6.14E-03 | 1.21(1.06-1.38) | 4.33E-01 | 3.42E-03 | 1.23(1.07-1.4) | 4.38E-01 |
| rs115365275 | C | 0.2597 | 0.2214 | 1.26E-03 | 1.247 | 1.10E-01 | 6.14E-03 | 1.21(1.06-1.38) | 4.33E-01 | 3.42E-03 | 1.23(1.07-1.4) | 4.38E-01 |
| rs117072125 | T | 0.2601 | 0.2221 | 1.27E-03 | 1.247 | 1.10E-01 | 6.26E-03 | 1.21(1.06-1.38) | 4.33E-01 | 3.47E-03 | 1.23(1.07-1.4) | 4.38E-01 |
| rs117800853 | T | 0.2817 | 0.323 | 1.30E-03 | 0.8156 | 1.10E-01 | 4.00E-03 | 0.83(0.73-0.94) | 4.33E-01 | 6.90E-03 | 0.84(0.74-0.95) | 4.38E-01 |
| rs191695336 | T | 0.0913 | 0.06837 | 1.30E-03 | 1.398 | 1.10E-01 | 2.54E-03 | 1.37(1.12-1.69) | 4.33E-01 | 1.48E-03 | 1.4(1.14-1.72) | 4.38E-01 |
| rs114488902 | G | 0.2829 | 0.3241 | 1.34E-03 | 0.8165 | 1.10E-01 | 3.99E-03 | 0.83(0.74-0.94) | 4.33E-01 | 6.66E-03 | 0.84(0.74-0.95) | 4.38E-01 |
| rs115421852 | T | 0.2829 | 0.3241 | 1.34E-03 | 0.8165 | 1.10E-01 | 3.99E-03 | 0.83(0.74-0.94) | 4.33E-01 | 6.66E-03 | 0.84(0.74-0.95) | 4.38E-01 |
| rs116009381 | C | 0.2829 | 0.3241 | 1.34E-03 | 0.8165 | 1.10E-01 | 3.99E-03 | 0.83(0.74-0.94) | 4.33E-01 | 6.66E-03 | 0.84(0.74-0.95) | 4.38E-01 |
| rs115757939 | T | 0.2829 | 0.3241 | 1.34E-03 | 0.8165 | 1.10E-01 | 3.99E-03 | 0.83(0.74-0.94) | 4.33E-01 | 6.66E-03 | 0.84(0.74-0.95) | 4.38E-01 |
| rs116189449 | A | 0.2829 | 0.3241 | 1.34E-03 | 0.8165 | 1.10E-01 | 3.99E-03 | 0.83(0.74-0.94) | 4.33E-01 | 6.66E-03 | 0.84(0.74-0.95) | 4.38E-01 |
| rs114483213 | T | 0.2829 | 0.3241 | 1.34E-03 | 0.8165 | 1.10E-01 | 3.99E-03 | 0.83(0.74-0.94) | 4.33E-01 | 6.66E-03 | 0.84(0.74-0.95) | 4.38E-01 |
| rs114138855 | G | 0.2829 | 0.3241 | 1.34E-03 | 0.8165 | 1.10E-01 | 3.99E-03 | 0.83(0.74-0.94) | 4.33E-01 | 6.66E-03 | 0.84(0.74-0.95) | 4.38E-01 |
| rs115936042 | A | 0.2829 | 0.3241 | 1.34E-03 | 0.8165 | 1.10E-01 | 3.99E-03 | 0.83(0.74-0.94) | 4.33E-01 | 6.66E-03 | 0.84(0.74-0.95) | 4.38E-01 |
| rs116279981 | G | 0.2829 | 0.3241 | 1.34E-03 | 0.8165 | 1.10E-01 | 3.99E-03 | 0.83(0.74-0.94) | 4.33E-01 | 6.66E-03 | 0.84(0.74-0.95) | 4.38E-01 |
| rs114538840 | C | 0.2829 | 0.3241 | 1.34E-03 | 0.8165 | 1.10E-01 | 3.99E-03 | 0.83(0.74-0.94) | 4.33E-01 | 6.66E-03 | 0.84(0.74-0.95) | 4.38E-01 |
| rs147785311 | T | 0.2829 | 0.3241 | 1.34E-03 | 0.8165 | 1.10E-01 | 3.99E-03 | 0.83(0.74-0.94) | 4.33E-01 | 6.66E-03 | 0.84(0.74-0.95) | 4.38E-01 |
| rs139660353 | A | 0.2515 | 0.2923 | 1.39E-03 | 0.8125 | 1.10E-01 | 4.92E-03 | 0.83(0.73-0.95) | 4.33E-01 | 8.46E-03 | 0.84(0.74-0.96) | 4.38E-01 |
| rs149735096 | T | 0.2515 | 0.2923 | 1.39E-03 | 0.8125 | 1.10E-01 | 4.92E-03 | 0.83(0.73-0.95) | 4.33E-01 | 8.46E-03 | 0.84(0.74-0.96) | 4.38E-01 |
| rs115375946 | C | 0.2661 | 0.228 | 1.41E-03 | 1.241 | 1.10E-01 | 6.81E-03 | 1.2(1.05-1.38) | 4.33E-01 | 4.21E-03 | 1.22(1.06-1.39) | 4.38E-01 |
| rs115882314 | T | 0.2661 | 0.228 | 1.41E-03 | 1.241 | 1.10E-01 | 6.81E-03 | 1.2(1.05-1.38) | 4.33E-01 | 4.21E-03 | 1.22(1.06-1.39) | 4.38E-01 |
| rs116058536 | A | 0.2661 | 0.228 | 1.41E-03 | 1.241 | 1.10E-01 | 6.81E-03 | 1.2(1.05-1.38) | 4.33E-01 | 4.21E-03 | 1.22(1.06-1.39) | 4.38E-01 |
| rs114889671 | A | 0.4466 | 0.4013 | 1.43E-03 | 1.208 | 1.10E-01 | 7.29E-03 | 1.17(1.04-1.32) | 4.33E-01 | 1.08E-02 | 1.17(1.04-1.31) | 4.62E-01 |
| rs151317723 | A | 0.2532 | 0.2934 | 1.44E-03 | 0.8132 | 1.10E-01 | 4.90E-03 | 0.83(0.73-0.95) | 4.33E-01 | 8.29E-03 | 0.84(0.74-0.96) | 4.38E-01 |
| rs114418700 | G | 0.3376 | 0.381 | 1.46E-03 | 0.8252 | 1.10E-01 | 2.33E-02 | 0.87(0.77-0.98) | 4.59E-01 | 3.77E-02 | 0.88(0.78-0.99) | 5.09E-01 |
| rs114992306 | C | 0.2528 | 0.2931 | 1.46E-03 | 0.8134 | 1.10E-01 | 5.02E-03 | 0.83(0.73-0.95) | 4.33E-01 | 8.49E-03 | 0.84(0.74-0.96) | 4.38E-01 |
| rs116627294 | A | 0.2597 | 0.2217 | 1.47E-03 | 1.243 | 1.10E-01 | 7.05E-03 | 1.2(1.05-1.38) | 4.33E-01 | 3.99E-03 | 1.22(1.07-1.4) | 4.38E-01 |
| rs116747585 | G | 0.2817 | 0.3226 | 1.48E-03 | 0.8176 | 1.10E-01 | 4.53E-03 | 0.83(0.74-0.95) | 4.33E-01 | 7.72E-03 | 0.84(0.74-0.96) | 4.38E-01 |
| rs114408303 | A | 0.2817 | 0.3226 | 1.48E-03 | 0.8176 | 1.10E-01 | 4.53E-03 | 0.83(0.74-0.95) | 4.33E-01 | 7.72E-03 | 0.84(0.74-0.96) | 4.38E-01 |
| rs114972778 | A | 0.2817 | 0.3226 | 1.48E-03 | 0.8176 | 1.10E-01 | 4.53E-03 | 0.83(0.74-0.95) | 4.33E-01 | 7.72E-03 | 0.84(0.74-0.96) | 4.38E-01 |
| rs116345248 | G | 0.2817 | 0.3226 | 1.48E-03 | 0.8176 | 1.10E-01 | 4.53E-03 | 0.83(0.74-0.95) | 4.33E-01 | 7.72E-03 | 0.84(0.74-0.96) | 4.38E-01 |
| rs115638397 | T | 0.2817 | 0.3226 | 1.48E-03 | 0.8176 | 1.10E-01 | 4.53E-03 | 0.83(0.74-0.95) | 4.33E-01 | 7.72E-03 | 0.84(0.74-0.96) | 4.38E-01 |
| rs115298199 | G | 0.2817 | 0.3226 | 1.48E-03 | 0.8176 | 1.10E-01 | 4.53E-03 | 0.83(0.74-0.95) | 4.33E-01 | 7.72E-03 | 0.84(0.74-0.96) | 4.38E-01 |
| rs114301622 | A | 0.2817 | 0.3226 | 1.48E-03 | 0.8176 | 1.10E-01 | 4.53E-03 | 0.83(0.74-0.95) | 4.33E-01 | 7.72E-03 | 0.84(0.74-0.96) | 4.38E-01 |
| rs116683109 | C | 0.2834 | 0.3241 | 1.50E-03 | 0.8183 | 1.10E-01 | 4.41E-03 | 0.83(0.74-0.95) | 4.33E-01 | 7.27E-03 | 0.84(0.74-0.95) | 4.38E-01 |
| rs114095365 | G | 0.2834 | 0.3241 | 1.50E-03 | 0.8183 | 1.10E-01 | 4.41E-03 | 0.83(0.74-0.95) | 4.33E-01 | 7.27E-03 | 0.84(0.74-0.95) | 4.38E-01 |
| rs114058896 | T | 0.2834 | 0.3241 | 1.50E-03 | 0.8183 | 1.10E-01 | 4.41E-03 | 0.83(0.74-0.95) | 4.33E-01 | 7.27E-03 | 0.84(0.74-0.95) | 4.38E-01 |
| rs116584965 | G | 0.2834 | 0.3241 | 1.50E-03 | 0.8183 | 1.10E-01 | 4.41E-03 | 0.83(0.74-0.95) | 4.33E-01 | 7.27E-03 | 0.84(0.74-0.95) | 4.38E-01 |
| rs116653333 | T | 0.2834 | 0.3241 | 1.50E-03 | 0.8183 | 1.10E-01 | 4.41E-03 | 0.83(0.74-0.95) | 4.33E-01 | 7.27E-03 | 0.84(0.74-0.95) | 4.38E-01 |
| rs116075820 | G | 0.2834 | 0.3241 | 1.50E-03 | 0.8183 | 1.10E-01 | 4.41E-03 | 0.83(0.74-0.95) | 4.33E-01 | 7.27E-03 | 0.84(0.74-0.95) | 4.38E-01 |
| rs139841215 | A | 0.2515 | 0.2919 | 1.50E-03 | 0.8135 | 1.10E-01 | 5.29E-03 | 0.83(0.73-0.95) | 4.33E-01 | 9.02E-03 | 0.84(0.74-0.96) | 4.38E-01 |
| rs114029633 | A | 0.2567 | 0.2169 | 1.52E-03 | 1.238 | 1.12E-01 | 1.46E-03 | 1.24(1.09-1.42) | 4.33E-01 | 3.39E-01 | 0.85(0.61-1.18) | 8.80E-01 |
| rs116555216 | G | 0.2532 | 0.2931 | 1.57E-03 | 0.8147 | 1.14E-01 | 5.43E-03 | 0.83(0.73-0.95) | 4.33E-01 | 9.09E-03 | 0.84(0.74-0.96) | 4.38E-01 |
| rs114809895 | A | 0.2528 | 0.2927 | 1.61E-03 | 0.8149 | 1.15E-01 | 5.50E-03 | 0.83(0.73-0.95) | 4.33E-01 | 9.31E-03 | 0.84(0.74-0.96) | 4.38E-01 |
| rs115089067 | C | 0.2528 | 0.2927 | 1.61E-03 | 0.8149 | 1.15E-01 | 5.50E-03 | 0.83(0.73-0.95) | 4.33E-01 | 9.31E-03 | 0.84(0.74-0.96) | 4.38E-01 |
| rs115083666 | G | 0.2528 | 0.2927 | 1.61E-03 | 0.8149 | 1.15E-01 | 5.50E-03 | 0.83(0.73-0.95) | 4.33E-01 | 9.31E-03 | 0.84(0.74-0.96) | 4.38E-01 |
| rs117295261 | T | 0.1365 | 0.1094 | 1.65E-03 | 1.323 | 1.16E-01 | 6.12E-03 | 1.28(1.07-1.52) | 4.33E-01 | 4.41E-03 | 1.29(1.08-1.54) | 4.38E-01 |
| rs114053724 | G | 0.2821 | 0.3226 | 1.66E-03 | 0.8195 | 1.16E-01 | 5.00E-03 | 0.84(0.74-0.95) | 4.33E-01 | 8.43E-03 | 0.84(0.75-0.96) | 4.38E-01 |
| rs116159563 | A | 0.2821 | 0.3226 | 1.66E-03 | 0.8195 | 1.16E-01 | 5.00E-03 | 0.84(0.74-0.95) | 4.33E-01 | 8.43E-03 | 0.84(0.75-0.96) | 4.38E-01 |
| rs115049787 | T | 0.3596 | 0.3208 | 1.66E-03 | 1.211 | 1.16E-01 | 6.70E-03 | 1.18(1.05-1.33) | 4.33E-01 | 5.38E-03 | 1.19(1.05-1.34) | 4.38E-01 |
| rs116058067 | A | 0.2519 | 0.2919 | 1.66E-03 | 0.8151 | 1.16E-01 | 5.77E-03 | 0.83(0.73-0.95) | 4.33E-01 | 9.63E-03 | 0.84(0.74-0.96) | 4.42E-01 |
| rs116586325 | T | 0.2519 | 0.2919 | 1.66E-03 | 0.8151 | 1.16E-01 | 5.77E-03 | 0.83(0.73-0.95) | 4.33E-01 | 9.63E-03 | 0.84(0.74-0.96) | 4.42E-01 |
| rs115424577 | C | 0.4432 | 0.4021 | 1.71E-03 | 1.203 | 1.19E-01 | 3.87E-03 | 1.19(1.06-1.33) | 4.33E-01 | 2.12E-03 | 1.2(1.07-1.35) | 4.38E-01 |
| rs115493047 | T | 0.2016 | 0.1626 | 1.74E-03 | 1.264 | 1.21E-01 | 1.38E-03 | 1.27(1.1-1.47) | 4.33E-01 | 1.02E-03 | 1.28(1.11-1.49) | 4.38E-01 |
| rs114984592 | A | 0.4091 | 0.3681 | 1.78E-03 | 1.203 | 1.22E-01 | 2.73E-03 | 1.2(1.06-1.34) | 4.33E-01 | 2.04E-03 | 1.2(1.07-1.35) | 4.38E-01 |
| rs115164306 | A | 0.05211 | 0.07169 | 1.79E-03 | 0.683 | 1.22E-01 | 2.98E-03 | 0.69(0.55-0.88) | 4.33E-01 | 3.47E-03 | 0.7(0.55-0.89) | 4.38E-01 |
| rs117956391 | A | 0.09087 | 0.068 | 1.80E-03 | 1.391 | 1.22E-01 | 3.72E-03 | 1.36(1.11-1.68) | 4.33E-01 | 2.25E-03 | 1.39(1.12-1.71) | 4.38E-01 |
| rs116309901 | C | 0.1085 | 0.1334 | 1.81E-03 | 0.7555 | 1.22E-01 | 9.30E-03 | 0.79(0.66-0.94) | 4.33E-01 | 7.77E-02 | 0.85(0.71-1.02) | 5.85E-01 |
| rs114750777 | T | 0.2588 | 0.2979 | 1.81E-03 | 0.8179 | 1.22E-01 | 6.10E-03 | 0.84(0.74-0.95) | 4.33E-01 | 9.76E-03 | 0.84(0.74-0.96) | 4.44E-01 |
| rs117565607 | A | 0.1266 | 0.1016 | 1.83E-03 | 1.33 | 1.23E-01 | 4.90E-03 | 1.3(1.08-1.55) | 4.33E-01 | 3.04E-03 | 1.32(1.1-1.58) | 4.38E-01 |
| rs116471209 | G | 0.3519 | 0.3902 | 1.85E-03 | 0.8288 | 1.24E-01 | 3.38E-03 | 0.84(0.74-0.94) | 4.33E-01 | 5.27E-03 | 0.84(0.75-0.95) | 4.38E-01 |
| rs116241938 | A | 0.1072 | 0.08463 | 1.89E-03 | 1.362 | 1.25E-01 | 4.48E-03 | 1.33(1.09-1.62) | 4.33E-01 | 5.27E-03 | 1.32(1.09-1.61) | 4.38E-01 |
| rs116434534 | T | 0.1115 | 0.1367 | 1.89E-03 | 0.7586 | 1.25E-01 | 8.93E-03 | 0.79(0.66-0.94) | 4.33E-01 | 7.55E-02 | 0.85(0.71-1.02) | 5.82E-01 |
| rs114743048 | G | 0.2649 | 0.228 | 1.93E-03 | 1.234 | 1.26E-01 | 9.08E-03 | 1.2(1.05-1.37) | 4.33E-01 | 5.74E-03 | 1.21(1.06-1.38) | 4.38E-01 |
| rs117584124 | G | 0.2024 | 0.1641 | 1.95E-03 | 1.26 | 1.26E-01 | 1.66E-03 | 1.27(1.09-1.47) | 4.33E-01 | 1.53E-03 | 1.27(1.1-1.47) | 4.38E-01 |
| AA_DRB1_32_32660052 | H | 0.3191 | 0.2868 | 1.97E-03 | 1.212 | 1.26E-01 | 3.10E-02 | 1.15(1.01-1.3) | 4.66E-01 | 2.65E-02 | 1.15(1.02-1.31) | 5.07E-01 |
| SNP_DRB1_32660053 | G | 0.3191 | 0.2868 | 1.97E-03 | 1.212 | 1.26E-01 | 3.10E-02 | 1.15(1.01-1.3) | 4.66E-01 | 2.65E-02 | 1.15(1.02-1.31) | 5.07E-01 |
| rs114249168 | A | 0.3652 | 0.3267 | 1.98E-03 | 1.205 | 1.26E-01 | 6.63E-03 | 1.18(1.05-1.33) | 4.33E-01 | 5.00E-03 | 1.19(1.05-1.34) | 4.38E-01 |
| rs115075106 | T | 0.3652 | 0.3267 | 1.98E-03 | 1.205 | 1.26E-01 | 6.63E-03 | 1.18(1.05-1.33) | 4.33E-01 | 5.00E-03 | 1.19(1.05-1.34) | 4.38E-01 |
| rs114297812 | T | 0.3652 | 0.3267 | 1.98E-03 | 1.205 | 1.26E-01 | 6.63E-03 | 1.18(1.05-1.33) | 4.33E-01 | 5.00E-03 | 1.19(1.05-1.34) | 4.38E-01 |
| rs116840378 | A | 0.3652 | 0.3267 | 1.98E-03 | 1.205 | 1.26E-01 | 6.63E-03 | 1.18(1.05-1.33) | 4.33E-01 | 5.00E-03 | 1.19(1.05-1.34) | 4.38E-01 |
| rs116510848 | A | 0.3652 | 0.3267 | 1.98E-03 | 1.205 | 1.26E-01 | 6.63E-03 | 1.18(1.05-1.33) | 4.33E-01 | 5.00E-03 | 1.19(1.05-1.34) | 4.38E-01 |
| rs114560392 | G | 0.3652 | 0.3267 | 1.98E-03 | 1.205 | 1.26E-01 | 6.63E-03 | 1.18(1.05-1.33) | 4.33E-01 | 5.00E-03 | 1.19(1.05-1.34) | 4.38E-01 |
| rs115949124 | C | 0.2597 | 0.2228 | 2.02E-03 | 1.235 | 1.28E-01 | 9.23E-03 | 1.2(1.05-1.37) | 4.33E-01 | 5.35E-03 | 1.21(1.06-1.39) | 4.38E-01 |
| rs115543332 | C | 0.124 | 0.102 | 2.06E-03 | 1.33 | 1.30E-01 | 1.76E-02 | 1.25(1.04-1.5) | 4.59E-01 | 4.22E-02 | 1.21(1.01-1.46) | 5.09E-01 |
| rs116548543 | G | 0.0969 | 0.07502 | 2.08E-03 | 1.377 | 1.31E-01 | 5.93E-03 | 1.33(1.09-1.64) | 4.33E-01 | 6.09E-03 | 1.33(1.09-1.64) | 4.38E-01 |
| rs116317815 | C | 0.258 | 0.2967 | 2.10E-03 | 0.8199 | 1.31E-01 | 7.14E-03 | 0.84(0.74-0.95) | 4.33E-01 | 1.16E-02 | 0.85(0.75-0.96) | 4.64E-01 |
| AA_DQB1_9_32740810_Y | A | 0.186 | 0.2217 | 2.13E-03 | 0.7992 | 1.32E-01 | 1.38E-01 | 0.89(0.77-1.04) | 6.65E-01 | 1.92E-01 | 0.9(0.78-1.05) | 7.67E-01 |
| SNP_DQB1_32740810 | A | 0.186 | 0.2217 | 2.13E-03 | 0.7992 | 1.32E-01 | 1.38E-01 | 0.89(0.77-1.04) | 6.65E-01 | 1.92E-01 | 0.9(0.78-1.05) | 7.67E-01 |
| rs115061978 | C | 0.2606 | 0.2239 | 2.13E-03 | 1.234 | 1.32E-01 | 9.48E-03 | 1.2(1.05-1.37) | 4.33E-01 | 5.39E-03 | 1.21(1.06-1.39) | 4.38E-01 |
| rs148475078 | C | 0.05728 | 0.07834 | 2.14E-03 | 0.7001 | 1.32E-01 | 8.33E-04 | 0.68(0.54-0.85) | 3.46E-01 | 1.89E-03 | 0.69(0.55-0.87) | 4.38E-01 |
| rs115111260 | C | 0.4892 | 0.4472 | 2.17E-03 | 1.194 | 1.33E-01 | 1.19E-02 | 1.16(1.03-1.3) | 4.38E-01 | 1.01E-02 | 1.16(1.04-1.31) | 4.54E-01 |
| rs114169696 | G | 0.1107 | 0.1356 | 2.24E-03 | 0.7616 | 1.36E-01 | 1.04E-02 | 0.79(0.67-0.95) | 4.33E-01 | 8.77E-02 | 0.85(0.71-1.02) | 6.07E-01 |
| rs114980741 | C | 0.3704 | 0.3315 | 2.25E-03 | 1.202 | 1.36E-01 | 7.30E-03 | 1.18(1.05-1.33) | 4.33E-01 | 5.28E-03 | 1.19(1.05-1.33) | 4.38E-01 |
| rs115044780 | C | 0.2606 | 0.299 | 2.29E-03 | 0.8215 | 1.38E-01 | 7.80E-03 | 0.84(0.74-0.96) | 4.33E-01 | 1.29E-02 | 0.85(0.75-0.97) | 4.81E-01 |
| rs114941882 | A | 0.2606 | 0.299 | 2.29E-03 | 0.8215 | 1.38E-01 | 7.80E-03 | 0.84(0.74-0.96) | 4.33E-01 | 1.29E-02 | 0.85(0.75-0.97) | 4.81E-01 |
| SNP_DRB1_32660115_A | P | 0.09819 | 0.1256 | 2.32E-03 | 0.7539 | 1.39E-01 | 5.69E-02 | 1.38(0.99-1.92) | 5.50E-01 | 1.00E-01 | 1.32(0.95-1.84) | 6.31E-01 |
| rs114444432 | G | 0.1128 | 0.08906 | 2.33E-03 | 1.345 | 1.39E-01 | 5.24E-03 | 1.31(1.09-1.59) | 4.33E-01 | 5.47E-03 | 1.31(1.08-1.59) | 4.38E-01 |
| rs114098189 | C | 0.2567 | 0.2956 | 2.37E-03 | 0.8219 | 1.40E-01 | 7.92E-03 | 0.84(0.74-0.96) | 4.33E-01 | 1.31E-02 | 0.85(0.75-0.97) | 4.81E-01 |
| rs116209343 | C | 0.2567 | 0.2956 | 2.37E-03 | 0.8219 | 1.40E-01 | 7.92E-03 | 0.84(0.74-0.96) | 4.33E-01 | 1.31E-02 | 0.85(0.75-0.97) | 4.81E-01 |
| rs113766478 | T | 0.2618 | 0.2258 | 2.41E-03 | 1.23 | 1.42E-01 | 1.04E-02 | 1.19(1.04-1.37) | 4.33E-01 | 6.13E-03 | 1.21(1.06-1.38) | 4.38E-01 |
| rs115810425 | G | 0.1934 | 0.1556 | 2.45E-03 | 1.258 | 1.44E-01 | 2.17E-03 | 1.26(1.09-1.47) | 4.33E-01 | 1.80E-03 | 1.27(1.09-1.47) | 4.38E-01 |
| rs117083927 | T | 0.08183 | 0.06098 | 2.45E-03 | 1.396 | 1.44E-01 | 5.09E-03 | 1.36(1.1-1.7) | 4.33E-01 | 2.91E-03 | 1.39(1.12-1.73) | 4.38E-01 |
| rs115659749 | T | 0.2175 | 0.2554 | 2.47E-03 | 0.8157 | 1.44E-01 | 9.68E-01 | 1(0.85-1.18) | 9.99E-01 | 8.50E-01 | 0.98(0.83-1.16) | 9.96E-01 |
| 32548889 | T | 0.04134 | 0.05876 | 2.56E-03 | 0.6667 | 1.48E-01 | 7.03E-01 | 1.07(0.75-1.53) | 9.75E-01 | 5.42E-01 | 1.12(0.78-1.6) | 9.51E-01 |
| rs114355396 | A | 0.1128 | 0.08943 | 2.57E-03 | 1.341 | 1.48E-01 | 5.77E-03 | 1.31(1.08-1.59) | 4.33E-01 | 6.08E-03 | 1.31(1.08-1.59) | 4.38E-01 |
| AA_DQB1_185_32737733_I | P | 0.3622 | 0.3936 | 2.61E-03 | 0.8346 | 1.48E-01 | 3.45E-01 | 0.94(0.82-1.07) | 8.34E-01 | 3.09E-01 | 0.93(0.82-1.07) | 8.44E-01 |
| AA_DQB1_185_32737733_T | A | 0.3622 | 0.3936 | 2.61E-03 | 0.8346 | 1.48E-01 | 3.45E-01 | 0.94(0.82-1.07) | 8.34E-01 | 3.09E-01 | 0.93(0.82-1.07) | 8.44E-01 |
| SNP_DQB1_32737733 | A | 0.3622 | 0.3936 | 2.61E-03 | 0.8346 | 1.48E-01 | 3.45E-01 | 0.94(0.82-1.07) | 8.34E-01 | 3.09E-01 | 0.93(0.82-1.07) | 8.44E-01 |
| SNP_DQB1_32742279_C | P | 0.3622 | 0.3936 | 2.61E-03 | 0.8346 | 1.48E-01 | 3.45E-01 | 0.94(0.82-1.07) | 8.34E-01 | 3.09E-01 | 0.93(0.82-1.07) | 8.44E-01 |
| SNP_DQB1_32742333_A | P | 0.3622 | 0.3936 | 2.61E-03 | 0.8346 | 1.48E-01 | 3.45E-01 | 0.94(0.82-1.07) | 8.34E-01 | 3.09E-01 | 0.93(0.82-1.07) | 8.44E-01 |
| rs9274655 | C | 0.3622 | 0.3936 | 2.61E-03 | 0.8346 | 1.48E-01 | 3.45E-01 | 0.94(0.82-1.07) | 8.34E-01 | 3.09E-01 | 0.93(0.82-1.07) | 8.44E-01 |
| rs114535584 | G | 0.3923 | 0.4327 | 2.67E-03 | 0.843 | 1.48E-01 | 2.32E-01 | 0.93(0.82-1.05) | 7.51E-01 | 2.27E-01 | 0.93(0.82-1.05) | 8.00E-01 |
| rs115026690 | T | 0.4121 | 0.452 | 2.68E-03 | 0.8405 | 1.48E-01 | 3.86E-03 | 0.85(0.75-0.95) | 4.33E-01 | 5.13E-03 | 0.85(0.76-0.95) | 4.38E-01 |
| 31438597 | T | 0.1895 | 0.2247 | 2.68E-03 | 0.8041 | 1.48E-01 | 1.84E-02 | 0.84(0.73-0.97) | 4.59E-01 | 2.91E-02 | 0.85(0.74-0.98) | 5.07E-01 |
| rs114620563 | G | 0.2567 | 0.2953 | 2.69E-03 | 0.824 | 1.48E-01 | 8.91E-03 | 0.84(0.74-0.96) | 4.33E-01 | 1.46E-02 | 0.85(0.75-0.97) | 5.07E-01 |
| rs114240877 | G | 0.2567 | 0.2953 | 2.69E-03 | 0.824 | 1.48E-01 | 8.91E-03 | 0.84(0.74-0.96) | 4.33E-01 | 1.46E-02 | 0.85(0.75-0.97) | 5.07E-01 |
| rs115236983 | A | 0.2567 | 0.2953 | 2.69E-03 | 0.824 | 1.48E-01 | 8.91E-03 | 0.84(0.74-0.96) | 4.33E-01 | 1.46E-02 | 0.85(0.75-0.97) | 5.07E-01 |
| rs116705993 | C | 0.1533 | 0.1297 | 2.75E-03 | 1.288 | 1.48E-01 | 2.08E-02 | 1.22(1.03-1.44) | 4.59E-01 | 3.82E-02 | 1.2(1.01-1.41) | 5.09E-01 |
| rs115662639 | T | 0.4113 | 0.4508 | 2.80E-03 | 0.8412 | 1.48E-01 | 3.88E-03 | 0.85(0.75-0.95) | 4.33E-01 | 5.07E-03 | 0.85(0.76-0.95) | 4.38E-01 |
| rs116639502 | G | 0.3842 | 0.3455 | 2.86E-03 | 1.194 | 1.48E-01 | 3.88E-03 | 1.19(1.06-1.34) | 4.33E-01 | 2.62E-03 | 1.2(1.07-1.35) | 4.38E-01 |
| rs114353479 | T | 0.3842 | 0.3455 | 2.86E-03 | 1.194 | 1.48E-01 | 3.88E-03 | 1.19(1.06-1.34) | 4.33E-01 | 2.62E-03 | 1.2(1.07-1.35) | 4.38E-01 |
| 32777115 | C | 0.06546 | 0.08758 | 2.88E-03 | 0.7191 | 1.48E-01 | 6.04E-01 | 1.08(0.8-1.46) | 9.67E-01 | 6.22E-01 | 1.08(0.8-1.45) | 9.64E-01 |
| SNP_DRB1_32657526 | A | 0.5112 | 0.48 | 2.89E-03 | 1.189 | 1.48E-01 | 8.43E-02 | 1.11(0.99-1.25) | 5.94E-01 | 7.46E-02 | 1.11(0.99-1.25) | 5.79E-01 |
| AA_DRB1_10_32660118_Q | A | 0.5112 | 0.48 | 2.89E-03 | 1.189 | 1.48E-01 | 8.43E-02 | 1.11(0.99-1.25) | 5.94E-01 | 7.46E-02 | 1.11(0.99-1.25) | 5.79E-01 |
| SNP_DRB1_32660119_G | A | 0.5112 | 0.48 | 2.89E-03 | 1.189 | 1.48E-01 | 8.43E-02 | 1.11(0.99-1.25) | 5.94E-01 | 7.46E-02 | 1.11(0.99-1.25) | 5.79E-01 |
| SNP_DRB1_32665401 | T | 0.5112 | 0.48 | 2.89E-03 | 1.189 | 1.48E-01 | 8.43E-02 | 1.11(0.99-1.25) | 5.94E-01 | 7.46E-02 | 1.11(0.99-1.25) | 5.79E-01 |
| AA_DRB1_-16_32665457_A | A | 0.5112 | 0.48 | 2.89E-03 | 1.189 | 1.48E-01 | 8.43E-02 | 1.11(0.99-1.25) | 5.94E-01 | 7.46E-02 | 1.11(0.99-1.25) | 5.79E-01 |
| SNP_DRB1_32665457 | A | 0.5112 | 0.48 | 2.89E-03 | 1.189 | 1.48E-01 | 8.43E-02 | 1.11(0.99-1.25) | 5.94E-01 | 7.46E-02 | 1.11(0.99-1.25) | 5.79E-01 |
| AA_DRB1_-25_32665484_K | A | 0.5112 | 0.48 | 2.89E-03 | 1.189 | 1.48E-01 | 8.43E-02 | 1.11(0.99-1.25) | 5.94E-01 | 7.46E-02 | 1.11(0.99-1.25) | 5.79E-01 |
| AA_DRB1_-25_32665484_R | P | 0.5112 | 0.48 | 2.89E-03 | 1.189 | 1.48E-01 | 8.43E-02 | 1.11(0.99-1.25) | 5.94E-01 | 7.46E-02 | 1.11(0.99-1.25) | 5.79E-01 |
| SNP_DRB1_32665484 | C | 0.5112 | 0.48 | 2.89E-03 | 1.189 | 1.48E-01 | 8.43E-02 | 1.11(0.99-1.25) | 5.94E-01 | 7.46E-02 | 1.11(0.99-1.25) | 5.79E-01 |
| rs116558479 | A | 0.07752 | 0.0983 | 2.94E-03 | 0.7353 | 1.48E-01 | 3.31E-03 | 0.74(0.6-0.9) | 4.33E-01 | 3.99E-03 | 0.74(0.6-0.91) | 4.38E-01 |
| rs117433623 | G | 0.04091 | 0.05802 | 2.94E-03 | 0.6691 | 1.48E-01 | 7.28E-01 | 1.07(0.75-1.52) | 9.87E-01 | 5.63E-01 | 1.11(0.78-1.58) | 9.53E-01 |
| rs115538259 | T | 0.2145 | 0.2517 | 2.94E-03 | 0.817 | 1.48E-01 | 9.95E-01 | 1(0.85-1.18) | 9.99E-01 | 8.19E-01 | 1.02(0.86-1.2) | 9.93E-01 |
| rs114470570 | C | 0.2145 | 0.2517 | 2.94E-03 | 0.817 | 1.48E-01 | 9.95E-01 | 1(0.85-1.18) | 9.99E-01 | 8.19E-01 | 1.02(0.86-1.2) | 9.93E-01 |
| rs114861550 | T | 0.2145 | 0.2517 | 2.94E-03 | 0.817 | 1.48E-01 | 9.95E-01 | 1(0.85-1.18) | 9.99E-01 | 8.19E-01 | 1.02(0.86-1.2) | 9.93E-01 |
| rs115293868 | G | 0.2145 | 0.2517 | 2.94E-03 | 0.817 | 1.48E-01 | 9.95E-01 | 1(0.85-1.18) | 9.99E-01 | 8.19E-01 | 1.02(0.86-1.2) | 9.93E-01 |
| rs116807240 | G | 0.2145 | 0.2517 | 2.94E-03 | 0.817 | 1.48E-01 | 9.95E-01 | 1(0.85-1.18) | 9.99E-01 | 8.19E-01 | 1.02(0.86-1.2) | 9.93E-01 |
| rs115721028 | A | 0.2145 | 0.2517 | 2.94E-03 | 0.817 | 1.48E-01 | 9.95E-01 | 1(0.85-1.18) | 9.99E-01 | 8.19E-01 | 1.02(0.86-1.2) | 9.93E-01 |
| rs113996801 | A | 0.2145 | 0.2517 | 2.94E-03 | 0.817 | 1.48E-01 | 9.95E-01 | 1(0.85-1.18) | 9.99E-01 | 8.19E-01 | 1.02(0.86-1.2) | 9.93E-01 |
| rs115219882 | T | 0.2145 | 0.2517 | 2.94E-03 | 0.817 | 1.48E-01 | 9.95E-01 | 1(0.85-1.18) | 9.99E-01 | 8.19E-01 | 1.02(0.86-1.2) | 9.93E-01 |
| rs114635570 | G | 0.2145 | 0.2517 | 2.94E-03 | 0.817 | 1.48E-01 | 9.95E-01 | 1(0.85-1.18) | 9.99E-01 | 8.19E-01 | 1.02(0.86-1.2) | 9.93E-01 |
| rs116567657 | A | 0.2145 | 0.2517 | 2.94E-03 | 0.817 | 1.48E-01 | 9.95E-01 | 1(0.85-1.18) | 9.99E-01 | 8.19E-01 | 1.02(0.86-1.2) | 9.93E-01 |
| rs150971595 | T | 0.1072 | 0.08389 | 2.97E-03 | 1.335 | 1.48E-01 | 7.64E-03 | 1.3(1.07-1.57) | 4.33E-01 | 3.88E-03 | 1.33(1.1-1.61) | 4.38E-01 |
| rs116642524 | G | 0.2067 | 0.1693 | 2.97E-03 | 1.245 | 1.48E-01 | 2.61E-03 | 1.25(1.08-1.45) | 4.33E-01 | 2.25E-03 | 1.26(1.09-1.45) | 4.38E-01 |
| rs114411309 | T | 0.1124 | 0.08943 | 2.98E-03 | 1.335 | 1.48E-01 | 6.59E-03 | 1.3(1.08-1.58) | 4.33E-01 | 6.87E-03 | 1.3(1.08-1.58) | 4.38E-01 |
| rs112790368 | C | 0.1882 | 0.2225 | 3.05E-03 | 0.806 | 1.48E-01 | 2.13E-02 | 0.84(0.73-0.98) | 4.59E-01 | 3.26E-02 | 0.85(0.74-0.99) | 5.09E-01 |
| rs113649915 | G | 0.1882 | 0.2225 | 3.05E-03 | 0.806 | 1.48E-01 | 2.13E-02 | 0.84(0.73-0.98) | 4.59E-01 | 3.26E-02 | 0.85(0.74-0.99) | 5.09E-01 |
| HLA_B_46 | P | 0.1697 | 0.1382 | 3.08E-03 | 1.27 | 1.48E-01 | 1.57E-02 | 1.22(1.04-1.43) | 4.59E-01 | 9.36E-03 | 1.24(1.05-1.45) | 4.38E-01 |
| HLA_B_4601 | P | 0.1697 | 0.1382 | 3.08E-03 | 1.27 | 1.48E-01 | 1.57E-02 | 1.22(1.04-1.43) | 4.59E-01 | 9.36E-03 | 1.24(1.05-1.45) | 4.38E-01 |
| AA_B_66_31432518_K | P | 0.1697 | 0.1382 | 3.08E-03 | 1.27 | 1.48E-01 | 1.57E-02 | 1.22(1.04-1.43) | 4.59E-01 | 9.36E-03 | 1.24(1.05-1.45) | 4.38E-01 |
| SNP_B_31432488 | A | 0.1697 | 0.1382 | 3.08E-03 | 1.27 | 1.48E-01 | 1.57E-02 | 1.22(1.04-1.43) | 4.59E-01 | 9.36E-03 | 1.24(1.05-1.45) | 4.38E-01 |
| AA_B_69_31432509_R | P | 0.1697 | 0.1382 | 3.08E-03 | 1.27 | 1.48E-01 | 1.57E-02 | 1.22(1.04-1.43) | 4.59E-01 | 9.36E-03 | 1.24(1.05-1.45) | 4.38E-01 |
| SNP_B_31432509 | C | 0.1697 | 0.1382 | 3.08E-03 | 1.27 | 1.48E-01 | 1.57E-02 | 1.22(1.04-1.43) | 4.59E-01 | 9.36E-03 | 1.24(1.05-1.45) | 4.38E-01 |
| SNP_B_31432510_G | P | 0.1697 | 0.1382 | 3.08E-03 | 1.27 | 1.48E-01 | 1.57E-02 | 1.22(1.04-1.43) | 4.59E-01 | 9.36E-03 | 1.24(1.05-1.45) | 4.38E-01 |
| SNP_B_31432517 | C | 0.1697 | 0.1382 | 3.08E-03 | 1.27 | 1.48E-01 | 1.57E-02 | 1.22(1.04-1.43) | 4.59E-01 | 9.36E-03 | 1.24(1.05-1.45) | 4.38E-01 |
| AA_B_76_31432488 | V | 0.1697 | 0.1382 | 3.08E-03 | 1.27 | 1.48E-01 | 1.57E-02 | 1.22(1.04-1.43) | 4.59E-01 | 9.36E-03 | 1.24(1.05-1.45) | 4.38E-01 |
| rs117046550 | A | 0.1047 | 0.1275 | 3.09E-03 | 0.7608 | 1.48E-01 | 8.68E-03 | 0.78(0.65-0.94) | 4.33E-01 | 7.47E-03 | 0.78(0.65-0.94) | 4.38E-01 |
| rs114721186 | T | 0.1283 | 0.1024 | 3.11E-03 | 1.309 | 1.48E-01 | 8.30E-03 | 1.27(1.06-1.52) | 4.33E-01 | 1.30E-02 | 1.26(1.05-1.5) | 4.81E-01 |
| rs114725367 | C | 0.1283 | 0.1024 | 3.11E-03 | 1.309 | 1.48E-01 | 8.30E-03 | 1.27(1.06-1.52) | 4.33E-01 | 1.30E-02 | 1.26(1.05-1.5) | 4.81E-01 |
| rs114669906 | A | 0.1977 | 0.1659 | 3.23E-03 | 1.242 | 1.52E-01 | 6.82E-03 | 1.22(1.06-1.41) | 4.33E-01 | 6.15E-03 | 1.23(1.06-1.42) | 4.38E-01 |
| 32440671 | A | 0.112 | 0.08906 | 3.25E-03 | 1.332 | 1.52E-01 | 7.05E-03 | 1.3(1.08-1.58) | 4.33E-01 | 7.22E-03 | 1.3(1.07-1.58) | 4.38E-01 |
| rs117016963 | T | 0.1611 | 0.1859 | 3.26E-03 | 0.7966 | 1.52E-01 | 3.67E-04 | 0.76(0.65-0.88) | 2.08E-01 | 2.40E-04 | 0.75(0.64-0.87) | 4.38E-01 |
| rs114256877 | A | 0.2003 | 0.2317 | 3.31E-03 | 0.813 | 1.52E-01 | 2.44E-03 | 0.81(0.7-0.93) | 4.33E-01 | 3.61E-03 | 0.81(0.71-0.93) | 4.38E-01 |
| rs114798565 | C | 0.06546 | 0.08721 | 3.37E-03 | 0.7221 | 1.52E-01 | 5.68E-01 | 1.09(0.81-1.47) | 9.43E-01 | 5.88E-01 | 1.09(0.81-1.47) | 9.61E-01 |
| rs116582876 | G | 0.06546 | 0.08721 | 3.37E-03 | 0.7221 | 1.52E-01 | 5.68E-01 | 1.09(0.81-1.47) | 9.43E-01 | 5.88E-01 | 1.09(0.81-1.47) | 9.61E-01 |
| rs114482127 | T | 0.06546 | 0.08721 | 3.37E-03 | 0.7221 | 1.52E-01 | 5.68E-01 | 1.09(0.81-1.47) | 9.43E-01 | 5.88E-01 | 1.09(0.81-1.47) | 9.61E-01 |
| rs114623884 | T | 0.06546 | 0.08721 | 3.37E-03 | 0.7221 | 1.52E-01 | 5.68E-01 | 1.09(0.81-1.47) | 9.43E-01 | 5.88E-01 | 1.09(0.81-1.47) | 9.61E-01 |
| rs116351884 | C | 0.06546 | 0.08721 | 3.37E-03 | 0.7221 | 1.52E-01 | 5.68E-01 | 1.09(0.81-1.47) | 9.43E-01 | 5.88E-01 | 1.09(0.81-1.47) | 9.61E-01 |
| rs115083929 | T | 0.06546 | 0.08721 | 3.37E-03 | 0.7221 | 1.52E-01 | 5.68E-01 | 1.09(0.81-1.47) | 9.43E-01 | 5.88E-01 | 1.09(0.81-1.47) | 9.61E-01 |
| rs111877993 | T | 0.06546 | 0.08721 | 3.37E-03 | 0.7221 | 1.52E-01 | 5.68E-01 | 1.09(0.81-1.47) | 9.43E-01 | 5.88E-01 | 1.09(0.81-1.47) | 9.61E-01 |
| rs114477932 | G | 0.06546 | 0.08721 | 3.37E-03 | 0.7221 | 1.52E-01 | 5.68E-01 | 1.09(0.81-1.47) | 9.43E-01 | 5.88E-01 | 1.09(0.81-1.47) | 9.61E-01 |
| rs115614045 | A | 0.06546 | 0.08721 | 3.37E-03 | 0.7221 | 1.52E-01 | 5.68E-01 | 1.09(0.81-1.47) | 9.43E-01 | 5.88E-01 | 1.09(0.81-1.47) | 9.61E-01 |
| rs115580594 | G | 0.06546 | 0.08721 | 3.37E-03 | 0.7221 | 1.52E-01 | 5.68E-01 | 1.09(0.81-1.47) | 9.43E-01 | 5.88E-01 | 1.09(0.81-1.47) | 9.61E-01 |
| rs112798625 | G | 0.1921 | 0.2262 | 3.40E-03 | 0.8086 | 1.52E-01 | 2.15E-02 | 0.84(0.73-0.98) | 4.59E-01 | 3.38E-02 | 0.86(0.74-0.99) | 5.09E-01 |
| rs114429653 | T | 0.1921 | 0.2262 | 3.40E-03 | 0.8086 | 1.52E-01 | 2.15E-02 | 0.84(0.73-0.98) | 4.59E-01 | 3.38E-02 | 0.86(0.74-0.99) | 5.09E-01 |
| rs112624486 | A | 0.1921 | 0.2262 | 3.40E-03 | 0.8086 | 1.52E-01 | 2.15E-02 | 0.84(0.73-0.98) | 4.59E-01 | 3.38E-02 | 0.86(0.74-0.99) | 5.09E-01 |
| rs113412841 | A | 0.1921 | 0.2262 | 3.40E-03 | 0.8086 | 1.52E-01 | 2.15E-02 | 0.84(0.73-0.98) | 4.59E-01 | 3.38E-02 | 0.86(0.74-0.99) | 5.09E-01 |
| rs114543727 | T | 0.1921 | 0.2262 | 3.40E-03 | 0.8086 | 1.52E-01 | 2.15E-02 | 0.84(0.73-0.98) | 4.59E-01 | 3.38E-02 | 0.86(0.74-0.99) | 5.09E-01 |
| rs115548533 | A | 0.1921 | 0.2262 | 3.40E-03 | 0.8086 | 1.52E-01 | 2.15E-02 | 0.84(0.73-0.98) | 4.59E-01 | 3.38E-02 | 0.86(0.74-0.99) | 5.09E-01 |
| rs115196726 | C | 0.2076 | 0.2395 | 3.43E-03 | 0.8138 | 1.52E-01 | 5.15E-03 | 0.82(0.71-0.94) | 4.33E-01 | 9.41E-03 | 0.83(0.72-0.96) | 4.38E-01 |
| rs115777983 | G | 0.2076 | 0.2395 | 3.43E-03 | 0.8138 | 1.52E-01 | 5.15E-03 | 0.82(0.71-0.94) | 4.33E-01 | 9.41E-03 | 0.83(0.72-0.96) | 4.38E-01 |
| rs116434681 | T | 0.1283 | 0.1027 | 3.46E-03 | 1.304 | 1.52E-01 | 9.17E-03 | 1.27(1.06-1.52) | 4.33E-01 | 1.44E-02 | 1.25(1.05-1.5) | 5.07E-01 |
| rs114749621 | A | 0.1283 | 0.1027 | 3.46E-03 | 1.304 | 1.52E-01 | 9.17E-03 | 1.27(1.06-1.52) | 4.33E-01 | 1.44E-02 | 1.25(1.05-1.5) | 5.07E-01 |
| rs115199069 | A | 0.1283 | 0.1027 | 3.46E-03 | 1.304 | 1.52E-01 | 9.17E-03 | 1.27(1.06-1.52) | 4.33E-01 | 1.44E-02 | 1.25(1.05-1.5) | 5.07E-01 |
| rs115132660 | A | 0.1283 | 0.1027 | 3.46E-03 | 1.304 | 1.52E-01 | 9.17E-03 | 1.27(1.06-1.52) | 4.33E-01 | 1.44E-02 | 1.25(1.05-1.5) | 5.07E-01 |
| rs116282195 | A | 0.1283 | 0.1027 | 3.46E-03 | 1.304 | 1.52E-01 | 9.17E-03 | 1.27(1.06-1.52) | 4.33E-01 | 1.44E-02 | 1.25(1.05-1.5) | 5.07E-01 |
| rs116701300 | C | 0.5202 | 0.48 | 3.48E-03 | 1.187 | 1.52E-01 | 1.57E-02 | 1.15(1.03-1.3) | 4.59E-01 | 2.13E-02 | 1.15(1.02-1.29) | 5.07E-01 |
| rs116347633 | C | 0.4432 | 0.4047 | 3.53E-03 | 1.186 | 1.54E-01 | 7.84E-03 | 1.17(1.04-1.31) | 4.33E-01 | 4.51E-03 | 1.18(1.05-1.33) | 4.38E-01 |
| rs115776538 | T | 0.112 | 0.08943 | 3.61E-03 | 1.328 | 1.55E-01 | 7.83E-03 | 1.3(1.07-1.57) | 4.33E-01 | 8.23E-03 | 1.3(1.07-1.57) | 4.38E-01 |
| rs115953474 | T | 0.112 | 0.08943 | 3.61E-03 | 1.328 | 1.55E-01 | 7.83E-03 | 1.3(1.07-1.57) | 4.33E-01 | 8.23E-03 | 1.3(1.07-1.57) | 4.38E-01 |
| rs115617174 | C | 0.112 | 0.08943 | 3.61E-03 | 1.328 | 1.55E-01 | 7.83E-03 | 1.3(1.07-1.57) | 4.33E-01 | 8.23E-03 | 1.3(1.07-1.57) | 4.38E-01 |
| rs145675776 | A | 0.112 | 0.08943 | 3.61E-03 | 1.328 | 1.55E-01 | 7.83E-03 | 1.3(1.07-1.57) | 4.33E-01 | 8.23E-03 | 1.3(1.07-1.57) | 4.38E-01 |
| rs115380885 | A | 0.112 | 0.08943 | 3.61E-03 | 1.328 | 1.55E-01 | 7.83E-03 | 1.3(1.07-1.57) | 4.33E-01 | 8.23E-03 | 1.3(1.07-1.57) | 4.38E-01 |
| rs116491334 | T | 0.112 | 0.08943 | 3.61E-03 | 1.328 | 1.55E-01 | 7.83E-03 | 1.3(1.07-1.57) | 4.33E-01 | 8.23E-03 | 1.3(1.07-1.57) | 4.38E-01 |
| rs114119672 | G | 0.112 | 0.08943 | 3.61E-03 | 1.328 | 1.55E-01 | 7.83E-03 | 1.3(1.07-1.57) | 4.33E-01 | 8.23E-03 | 1.3(1.07-1.57) | 4.38E-01 |
| rs149795817 | G | 0.1068 | 0.08537 | 3.70E-03 | 1.334 | 1.57E-01 | 8.44E-03 | 1.3(1.07-1.58) | 4.33E-01 | 9.42E-03 | 1.3(1.07-1.58) | 4.38E-01 |
| rs35303934 | A | 0.2459 | 0.2816 | 3.71E-03 | 0.8271 | 1.57E-01 | 1.02E-02 | 0.84(0.74-0.96) | 4.33E-01 | 1.59E-02 | 0.85(0.75-0.97) | 5.07E-01 |
| rs114193276 | T | 0.07235 | 0.09165 | 3.74E-03 | 0.7338 | 1.57E-01 | 5.05E-03 | 0.74(0.6-0.91) | 4.33E-01 | 7.48E-03 | 0.75(0.61-0.93) | 4.38E-01 |
| rs114653252 | T | 0.07235 | 0.09165 | 3.74E-03 | 0.7338 | 1.57E-01 | 5.05E-03 | 0.74(0.6-0.91) | 4.33E-01 | 7.48E-03 | 0.75(0.61-0.93) | 4.38E-01 |
| rs116330858 | A | 0.07235 | 0.09165 | 3.74E-03 | 0.7338 | 1.57E-01 | 5.05E-03 | 0.74(0.6-0.91) | 4.33E-01 | 7.48E-03 | 0.75(0.61-0.93) | 4.38E-01 |
| rs114618774 | A | 0.07235 | 0.09165 | 3.74E-03 | 0.7338 | 1.57E-01 | 5.05E-03 | 0.74(0.6-0.91) | 4.33E-01 | 7.48E-03 | 0.75(0.61-0.93) | 4.38E-01 |
| rs2233963 | A | 0.2347 | 0.1999 | 3.80E-03 | 1.227 | 1.59E-01 | 2.24E-02 | 1.18(1.02-1.35) | 4.59E-01 | 2.32E-02 | 1.18(1.02-1.35) | 5.07E-01 |
| rs115457135 | A | 0.3256 | 0.3659 | 3.87E-03 | 0.8394 | 1.62E-01 | 4.47E-03 | 0.84(0.75-0.95) | 4.33E-01 | 7.17E-03 | 0.85(0.75-0.96) | 4.38E-01 |
| rs114354688 | C | 0.3609 | 0.3252 | 3.88E-03 | 1.19 | 1.62E-01 | 4.58E-03 | 1.19(1.06-1.34) | 4.33E-01 | 3.14E-03 | 1.2(1.06-1.35) | 4.38E-01 |
| rs115370061 | A | 0.413 | 0.4512 | 3.89E-03 | 0.8463 | 1.62E-01 | 5.23E-03 | 0.85(0.76-0.95) | 4.33E-01 | 6.91E-03 | 0.85(0.76-0.96) | 4.38E-01 |
| rs116532959 | C | 0.345 | 0.3071 | 3.94E-03 | 1.199 | 1.63E-01 | 1.74E-02 | 1.16(1.03-1.32) | 4.59E-01 | 1.48E-02 | 1.17(1.03-1.32) | 5.07E-01 |
| rs114075360 | T | 0.1611 | 0.1851 | 3.99E-03 | 0.8003 | 1.64E-01 | 4.72E-04 | 0.76(0.65-0.89) | 2.35E-01 | 3.17E-04 | 0.75(0.65-0.88) | 4.38E-01 |
| rs115253678 | G | 0.3618 | 0.3259 | 4.00E-03 | 1.19 | 1.64E-01 | 4.80E-03 | 1.19(1.05-1.34) | 4.33E-01 | 3.29E-03 | 1.2(1.06-1.35) | 4.38E-01 |
| rs116669262 | A | 0.3618 | 0.3259 | 4.00E-03 | 1.19 | 1.64E-01 | 4.80E-03 | 1.19(1.05-1.34) | 4.33E-01 | 3.29E-03 | 1.2(1.06-1.35) | 4.38E-01 |
| rs116235810 | A | 0.3618 | 0.3259 | 4.00E-03 | 1.19 | 1.64E-01 | 4.80E-03 | 1.19(1.05-1.34) | 4.33E-01 | 3.29E-03 | 1.2(1.06-1.35) | 4.38E-01 |
| SNP_DQB1_32740605_C | A | 0.1154 | 0.1452 | 4.04E-03 | 0.781 | 1.65E-01 | 5.00E-01 | 0.94(0.77-1.13) | 9.18E-01 | 6.69E-01 | 0.96(0.79-1.16) | 9.72E-01 |
| rs114103504 | A | 0.4311 | 0.3902 | 4.06E-03 | 1.185 | 1.66E-01 | 6.64E-03 | 1.18(1.05-1.32) | 4.33E-01 | 3.56E-03 | 1.19(1.06-1.34) | 4.38E-01 |
| rs114514835 | T | 0.2024 | 0.2332 | 4.17E-03 | 0.8177 | 1.69E-01 | 3.28E-03 | 0.81(0.71-0.93) | 4.33E-01 | 4.65E-03 | 0.82(0.71-0.94) | 4.38E-01 |
| rs117980426 | C | 0.06417 | 0.04361 | 4.19E-03 | 1.449 | 1.69E-01 | 4.84E-03 | 1.44(1.12-1.86) | 4.33E-01 | 3.87E-03 | 1.46(1.13-1.89) | 4.38E-01 |
| rs114165554 | G | 0.06417 | 0.04361 | 4.19E-03 | 1.449 | 1.69E-01 | 4.84E-03 | 1.44(1.12-1.86) | 4.33E-01 | 3.87E-03 | 1.46(1.13-1.89) | 4.38E-01 |
| rs141994373 | T | 0.3609 | 0.3256 | 4.29E-03 | 1.188 | 1.69E-01 | 5.08E-03 | 1.19(1.05-1.34) | 4.33E-01 | 3.47E-03 | 1.2(1.06-1.35) | 4.38E-01 |
| rs114926307 | T | 0.4018 | 0.3633 | 4.29E-03 | 1.183 | 1.69E-01 | 5.83E-03 | 1.18(1.05-1.32) | 4.33E-01 | 3.90E-03 | 1.19(1.06-1.33) | 4.38E-01 |
| rs118082229 | T | 0.0969 | 0.07243 | 4.32E-03 | 1.348 | 1.69E-01 | 5.94E-03 | 1.34(1.09-1.64) | 4.33E-01 | 4.46E-03 | 1.35(1.1-1.66) | 4.38E-01 |
| rs115132255 | A | 0.3605 | 0.3252 | 4.33E-03 | 1.188 | 1.69E-01 | 5.08E-03 | 1.19(1.05-1.34) | 4.33E-01 | 3.51E-03 | 1.19(1.06-1.35) | 4.38E-01 |
| rs114487499 | G | 0.3605 | 0.3252 | 4.33E-03 | 1.188 | 1.69E-01 | 5.08E-03 | 1.19(1.05-1.34) | 4.33E-01 | 3.51E-03 | 1.19(1.06-1.35) | 4.38E-01 |
| rs116637576 | C | 0.3605 | 0.3252 | 4.33E-03 | 1.188 | 1.69E-01 | 5.08E-03 | 1.19(1.05-1.34) | 4.33E-01 | 3.51E-03 | 1.19(1.06-1.35) | 4.38E-01 |
| rs115948180 | A | 0.3605 | 0.3252 | 4.33E-03 | 1.188 | 1.69E-01 | 5.08E-03 | 1.19(1.05-1.34) | 4.33E-01 | 3.51E-03 | 1.19(1.06-1.35) | 4.38E-01 |
| rs115950730 | T | 0.3605 | 0.3252 | 4.33E-03 | 1.188 | 1.69E-01 | 5.08E-03 | 1.19(1.05-1.34) | 4.33E-01 | 3.51E-03 | 1.19(1.06-1.35) | 4.38E-01 |
| rs114578586 | C | 0.3605 | 0.3252 | 4.33E-03 | 1.188 | 1.69E-01 | 5.08E-03 | 1.19(1.05-1.34) | 4.33E-01 | 3.51E-03 | 1.19(1.06-1.35) | 4.38E-01 |
| rs115334439 | G | 0.3605 | 0.3252 | 4.33E-03 | 1.188 | 1.69E-01 | 5.08E-03 | 1.19(1.05-1.34) | 4.33E-01 | 3.51E-03 | 1.19(1.06-1.35) | 4.38E-01 |
| rs116244866 | A | 0.3605 | 0.3252 | 4.33E-03 | 1.188 | 1.69E-01 | 5.08E-03 | 1.19(1.05-1.34) | 4.33E-01 | 3.51E-03 | 1.19(1.06-1.35) | 4.38E-01 |
| rs116580415 | T | 0.3605 | 0.3252 | 4.33E-03 | 1.188 | 1.69E-01 | 5.08E-03 | 1.19(1.05-1.34) | 4.33E-01 | 3.51E-03 | 1.19(1.06-1.35) | 4.38E-01 |
| rs114116651 | A | 0.3605 | 0.3252 | 4.33E-03 | 1.188 | 1.69E-01 | 5.08E-03 | 1.19(1.05-1.34) | 4.33E-01 | 3.51E-03 | 1.19(1.06-1.35) | 4.38E-01 |
| rs114615342 | T | 0.2558 | 0.2919 | 4.37E-03 | 0.8314 | 1.70E-01 | 1.35E-02 | 0.85(0.75-0.97) | 4.59E-01 | 2.11E-02 | 0.86(0.76-0.98) | 5.07E-01 |
| rs114241823 | C | 0.2558 | 0.2919 | 4.37E-03 | 0.8314 | 1.70E-01 | 1.35E-02 | 0.85(0.75-0.97) | 4.59E-01 | 2.11E-02 | 0.86(0.76-0.98) | 5.07E-01 |
| rs114971485 | T | 0.3463 | 0.3089 | 4.40E-03 | 1.196 | 1.71E-01 | 1.90E-02 | 1.16(1.03-1.31) | 4.59E-01 | 1.65E-02 | 1.17(1.03-1.32) | 5.07E-01 |
| rs115067197 | C | 0.503 | 0.4638 | 4.48E-03 | 1.178 | 1.73E-01 | 2.42E-02 | 1.14(1.02-1.28) | 4.59E-01 | 2.02E-02 | 1.15(1.02-1.28) | 5.07E-01 |
| rs115590310 | A | 0.4996 | 0.4612 | 4.54E-03 | 1.178 | 1.75E-01 | 6.35E-03 | 1.17(1.05-1.31) | 4.33E-01 | 5.02E-03 | 1.18(1.05-1.32) | 4.38E-01 |
| rs115983894 | T | 0.301 | 0.2664 | 4.56E-03 | 1.199 | 1.75E-01 | 3.89E-02 | 1.14(1.01-1.3) | 4.75E-01 | 3.33E-02 | 1.15(1.01-1.3) | 5.09E-01 |
| rs115370147 | C | 0.3605 | 0.3256 | 4.64E-03 | 1.186 | 1.78E-01 | 5.46E-03 | 1.18(1.05-1.33) | 4.33E-01 | 3.76E-03 | 1.19(1.06-1.34) | 4.38E-01 |
| rs115319326 | A | 0.2394 | 0.2742 | 4.73E-03 | 0.8299 | 1.80E-01 | 1.33E-02 | 0.85(0.74-0.97) | 4.57E-01 | 2.19E-02 | 0.86(0.75-0.98) | 5.07E-01 |
| rs116780990 | A | 0.2394 | 0.2742 | 4.73E-03 | 0.8299 | 1.80E-01 | 1.33E-02 | 0.85(0.74-0.97) | 4.57E-01 | 2.19E-02 | 0.86(0.75-0.98) | 5.07E-01 |
| rs116723490 | T | 0.3269 | 0.2912 | 4.76E-03 | 1.187 | 1.80E-01 | 5.26E-03 | 1.19(1.05-1.34) | 4.33E-01 | 3.60E-03 | 1.2(1.06-1.35) | 4.38E-01 |
| rs115306967 | C | 0.2011 | 0.1711 | 4.81E-03 | 1.238 | 1.80E-01 | 3.43E-02 | 1.18(1.01-1.37) | 4.67E-01 | 1.96E-02 | 1.2(1.03-1.39) | 5.07E-01 |
| rs116548975 | T | 0.07838 | 0.09719 | 4.85E-03 | 0.7499 | 1.80E-01 | 4.85E-03 | 0.75(0.61-0.92) | 4.33E-01 | 4.06E-03 | 0.74(0.61-0.91) | 4.38E-01 |
| rs116186675 | A | 0.05771 | 0.07539 | 4.91E-03 | 0.7181 | 1.80E-01 | 7.33E-03 | 0.73(0.58-0.92) | 4.33E-01 | 7.83E-03 | 0.73(0.58-0.92) | 4.38E-01 |
| rs143968109 | C | 0.3445 | 0.306 | 4.95E-03 | 1.192 | 1.80E-01 | 8.86E-03 | 1.18(1.04-1.33) | 4.33E-01 | 8.27E-03 | 1.18(1.04-1.34) | 4.38E-01 |
| rs144170784 | C | 0.5052 | 0.4645 | 4.95E-03 | 1.177 | 1.80E-01 | 3.73E-02 | 1.13(1.01-1.27) | 4.75E-01 | 5.77E-02 | 1.12(1-1.26) | 5.48E-01 |
| rs115526380 | A | 0.5052 | 0.4645 | 4.95E-03 | 1.177 | 1.80E-01 | 3.73E-02 | 1.13(1.01-1.27) | 4.75E-01 | 5.77E-02 | 1.12(1-1.26) | 5.48E-01 |
| rs115475871 | G | 0.5052 | 0.4645 | 4.95E-03 | 1.177 | 1.80E-01 | 3.73E-02 | 1.13(1.01-1.27) | 4.75E-01 | 5.77E-02 | 1.12(1-1.26) | 5.48E-01 |
| rs115879866 | T | 0.5052 | 0.4645 | 4.95E-03 | 1.177 | 1.80E-01 | 3.73E-02 | 1.13(1.01-1.27) | 4.75E-01 | 5.77E-02 | 1.12(1-1.26) | 5.48E-01 |
| rs115191715 | T | 0.1447 | 0.1201 | 4.98E-03 | 1.272 | 1.80E-01 | 2.43E-02 | 1.22(1.03-1.44) | 4.59E-01 | 2.36E-02 | 1.22(1.03-1.44) | 5.07E-01 |
| rs114417437 | T | 0.3553 | 0.3171 | 4.98E-03 | 1.189 | 1.80E-01 | 9.56E-03 | 1.18(1.04-1.33) | 4.33E-01 | 9.84E-03 | 1.17(1.04-1.33) | 4.45E-01 |
| rs115845052 | T | 0.3867 | 0.3503 | 5.08E-03 | 1.18 | 1.80E-01 | 6.79E-03 | 1.18(1.05-1.32) | 4.33E-01 | 4.66E-03 | 1.18(1.05-1.33) | 4.38E-01 |
| rs115915569 | T | 0.3867 | 0.3503 | 5.08E-03 | 1.18 | 1.80E-01 | 6.79E-03 | 1.18(1.05-1.32) | 4.33E-01 | 4.66E-03 | 1.18(1.05-1.33) | 4.38E-01 |
| rs116081305 | T | 0.3867 | 0.3503 | 5.08E-03 | 1.18 | 1.80E-01 | 6.79E-03 | 1.18(1.05-1.32) | 4.33E-01 | 4.66E-03 | 1.18(1.05-1.33) | 4.38E-01 |
| rs115929234 | G | 0.3898 | 0.3529 | 5.08E-03 | 1.18 | 1.80E-01 | 6.65E-03 | 1.18(1.05-1.32) | 4.33E-01 | 4.61E-03 | 1.18(1.05-1.33) | 4.38E-01 |
| rs114790201 | T | 0.3898 | 0.3529 | 5.08E-03 | 1.18 | 1.80E-01 | 6.65E-03 | 1.18(1.05-1.32) | 4.33E-01 | 4.61E-03 | 1.18(1.05-1.33) | 4.38E-01 |
| rs115846322 | G | 0.3898 | 0.3529 | 5.08E-03 | 1.18 | 1.80E-01 | 6.65E-03 | 1.18(1.05-1.32) | 4.33E-01 | 4.61E-03 | 1.18(1.05-1.33) | 4.38E-01 |
| rs114817676 | A | 0.3898 | 0.3529 | 5.08E-03 | 1.18 | 1.80E-01 | 6.65E-03 | 1.18(1.05-1.32) | 4.33E-01 | 4.61E-03 | 1.18(1.05-1.33) | 4.38E-01 |
| rs116784856 | T | 0.3898 | 0.3529 | 5.08E-03 | 1.18 | 1.80E-01 | 6.65E-03 | 1.18(1.05-1.32) | 4.33E-01 | 4.61E-03 | 1.18(1.05-1.33) | 4.38E-01 |
| rs116088038 | A | 0.3898 | 0.3529 | 5.08E-03 | 1.18 | 1.80E-01 | 6.65E-03 | 1.18(1.05-1.32) | 4.33E-01 | 4.61E-03 | 1.18(1.05-1.33) | 4.38E-01 |
| rs115671802 | A | 0.3898 | 0.3529 | 5.08E-03 | 1.18 | 1.80E-01 | 6.65E-03 | 1.18(1.05-1.32) | 4.33E-01 | 4.61E-03 | 1.18(1.05-1.33) | 4.38E-01 |
| rs114183900 | T | 0.3898 | 0.3529 | 5.08E-03 | 1.18 | 1.80E-01 | 6.65E-03 | 1.18(1.05-1.32) | 4.33E-01 | 4.61E-03 | 1.18(1.05-1.33) | 4.38E-01 |
| rs115380504 | T | 0.3898 | 0.3529 | 5.08E-03 | 1.18 | 1.80E-01 | 6.65E-03 | 1.18(1.05-1.32) | 4.33E-01 | 4.61E-03 | 1.18(1.05-1.33) | 4.38E-01 |
| rs114762590 | C | 0.3898 | 0.3529 | 5.08E-03 | 1.18 | 1.80E-01 | 6.65E-03 | 1.18(1.05-1.32) | 4.33E-01 | 4.61E-03 | 1.18(1.05-1.33) | 4.38E-01 |
| rs115085375 | C | 0.3898 | 0.3529 | 5.08E-03 | 1.18 | 1.80E-01 | 6.65E-03 | 1.18(1.05-1.32) | 4.33E-01 | 4.61E-03 | 1.18(1.05-1.33) | 4.38E-01 |
| rs116411441 | A | 0.3898 | 0.3529 | 5.08E-03 | 1.18 | 1.80E-01 | 6.65E-03 | 1.18(1.05-1.32) | 4.33E-01 | 4.61E-03 | 1.18(1.05-1.33) | 4.38E-01 |
| rs114885790 | T | 0.3898 | 0.3529 | 5.08E-03 | 1.18 | 1.80E-01 | 6.65E-03 | 1.18(1.05-1.32) | 4.33E-01 | 4.61E-03 | 1.18(1.05-1.33) | 4.38E-01 |
| rs115911526 | A | 0.1115 | 0.0898 | 5.10E-03 | 1.314 | 1.80E-01 | 1.08E-02 | 1.28(1.06-1.55) | 4.33E-01 | 1.12E-02 | 1.28(1.06-1.56) | 4.64E-01 |
| rs115550455 | A | 0.1115 | 0.0898 | 5.10E-03 | 1.314 | 1.80E-01 | 1.08E-02 | 1.28(1.06-1.55) | 4.33E-01 | 1.12E-02 | 1.28(1.06-1.56) | 4.64E-01 |
| rs138208093 | C | 0.1115 | 0.0898 | 5.10E-03 | 1.314 | 1.80E-01 | 1.08E-02 | 1.28(1.06-1.55) | 4.33E-01 | 1.12E-02 | 1.28(1.06-1.56) | 4.64E-01 |
| rs116069184 | C | 0.1115 | 0.0898 | 5.10E-03 | 1.314 | 1.80E-01 | 1.08E-02 | 1.28(1.06-1.55) | 4.33E-01 | 1.12E-02 | 1.28(1.06-1.56) | 4.64E-01 |
| rs116623626 | T | 0.3859 | 0.3496 | 5.11E-03 | 1.181 | 1.80E-01 | 6.35E-03 | 1.18(1.05-1.32) | 4.33E-01 | 4.50E-03 | 1.19(1.05-1.33) | 4.38E-01 |
| rs115616803 | A | 0.3484 | 0.3115 | 5.12E-03 | 1.192 | 1.80E-01 | 1.94E-02 | 1.16(1.02-1.31) | 4.59E-01 | 1.67E-02 | 1.16(1.03-1.32) | 5.07E-01 |
| SNP_DQB1_32742319_A | P | 0.4526 | 0.4837 | 5.17E-03 | 0.8499 | 1.80E-01 | 2.61E-01 | 0.93(0.83-1.05) | 7.59E-01 | 2.08E-01 | 0.92(0.82-1.05) | 7.81E-01 |
| SNP_DQB1_32742351_C | P | 0.4526 | 0.4837 | 5.17E-03 | 0.8499 | 1.80E-01 | 2.61E-01 | 0.93(0.83-1.05) | 7.59E-01 | 2.08E-01 | 0.92(0.82-1.05) | 7.81E-01 |
| rs115096010 | A | 0.0646 | 0.04435 | 5.18E-03 | 1.434 | 1.80E-01 | 5.85E-03 | 1.43(1.11-1.84) | 4.33E-01 | 4.74E-03 | 1.44(1.12-1.86) | 4.38E-01 |
| rs116265549 | A | 0.0646 | 0.04435 | 5.18E-03 | 1.434 | 1.80E-01 | 5.85E-03 | 1.43(1.11-1.84) | 4.33E-01 | 4.74E-03 | 1.44(1.12-1.86) | 4.38E-01 |
| rs116321290 | C | 0.0857 | 0.06615 | 5.19E-03 | 1.358 | 1.80E-01 | 2.21E-02 | 1.29(1.04-1.6) | 4.59E-01 | 6.69E-02 | 1.23(0.99-1.53) | 5.60E-01 |
| rs116805908 | T | 0.06029 | 0.04213 | 5.21E-03 | 1.45 | 1.81E-01 | 1.30E-02 | 1.39(1.07-1.81) | 4.53E-01 | 8.40E-03 | 1.42(1.1-1.85) | 4.38E-01 |
| rs116120044 | T | 0.07149 | 0.09239 | 5.31E-03 | 0.7426 | 1.84E-01 | 5.49E-03 | 0.74(0.6-0.92) | 4.33E-01 | 5.91E-03 | 0.74(0.6-0.92) | 4.38E-01 |
| rs114546939 | A | 0.4556 | 0.4132 | 5.33E-03 | 1.176 | 1.84E-01 | 1.32E-02 | 1.16(1.03-1.3) | 4.57E-01 | 6.51E-03 | 1.17(1.05-1.32) | 4.38E-01 |
| rs114958136 | G | 0.3454 | 0.3075 | 5.38E-03 | 1.19 | 1.84E-01 | 9.61E-03 | 1.18(1.04-1.33) | 4.33E-01 | 8.86E-03 | 1.18(1.04-1.33) | 4.38E-01 |
| AA_DRB1_-16_32665457_V | P | 0.5052 | 0.4767 | 5.39E-03 | 1.175 | 1.84E-01 | 1.21E-01 | 1.1(0.98-1.23) | 6.46E-01 | 1.09E-01 | 1.1(0.98-1.24) | 6.45E-01 |
| rs148827734 | T | 0.3445 | 0.3064 | 5.41E-03 | 1.189 | 1.84E-01 | 9.67E-03 | 1.18(1.04-1.33) | 4.33E-01 | 8.98E-03 | 1.18(1.04-1.33) | 4.38E-01 |
| rs114967700 | G | 0.3893 | 0.3529 | 5.43E-03 | 1.179 | 1.84E-01 | 7.06E-03 | 1.17(1.05-1.32) | 4.33E-01 | 4.94E-03 | 1.18(1.05-1.33) | 4.38E-01 |
| rs115683506 | A | 0.3893 | 0.3529 | 5.43E-03 | 1.179 | 1.84E-01 | 7.06E-03 | 1.17(1.05-1.32) | 4.33E-01 | 4.94E-03 | 1.18(1.05-1.33) | 4.38E-01 |
| rs115771165 | T | 0.3893 | 0.3529 | 5.43E-03 | 1.179 | 1.84E-01 | 7.06E-03 | 1.17(1.05-1.32) | 4.33E-01 | 4.94E-03 | 1.18(1.05-1.33) | 4.38E-01 |
| rs114273723 | T | 0.3893 | 0.3529 | 5.43E-03 | 1.179 | 1.84E-01 | 7.06E-03 | 1.17(1.05-1.32) | 4.33E-01 | 4.94E-03 | 1.18(1.05-1.33) | 4.38E-01 |
| rs115467058 | T | 0.3893 | 0.3529 | 5.43E-03 | 1.179 | 1.84E-01 | 7.06E-03 | 1.17(1.05-1.32) | 4.33E-01 | 4.94E-03 | 1.18(1.05-1.33) | 4.38E-01 |
| rs115155251 | G | 0.4991 | 0.4616 | 5.45E-03 | 1.174 | 1.84E-01 | 7.59E-03 | 1.17(1.04-1.31) | 4.33E-01 | 6.09E-03 | 1.17(1.05-1.32) | 4.38E-01 |
| rs115039788 | A | 0.1714 | 0.2014 | 5.47E-03 | 0.8124 | 1.84E-01 | 5.46E-03 | 0.81(0.7-0.94) | 4.33E-01 | 5.35E-03 | 0.81(0.7-0.94) | 4.38E-01 |
| rs114471105 | A | 0.1714 | 0.2014 | 5.47E-03 | 0.8124 | 1.84E-01 | 5.46E-03 | 0.81(0.7-0.94) | 4.33E-01 | 5.35E-03 | 0.81(0.7-0.94) | 4.38E-01 |
| rs116079468 | T | 0.1714 | 0.2014 | 5.47E-03 | 0.8124 | 1.84E-01 | 5.46E-03 | 0.81(0.7-0.94) | 4.33E-01 | 5.35E-03 | 0.81(0.7-0.94) | 4.38E-01 |
| rs114434775 | G | 0.04866 | 0.06726 | 5.52E-03 | 0.7063 | 1.85E-01 | 5.87E-01 | 0.93(0.7-1.22) | 9.54E-01 | 6.42E-01 | 0.94(0.71-1.24) | 9.66E-01 |
| rs115231984 | A | 0.1533 | 0.1848 | 5.53E-03 | 0.804 | 1.85E-01 | 3.24E-02 | 0.84(0.72-0.99) | 4.67E-01 | 3.98E-02 | 0.85(0.73-0.99) | 5.09E-01 |
| rs116113162 | C | 0.3415 | 0.3792 | 5.63E-03 | 0.8473 | 1.86E-01 | 6.86E-03 | 0.85(0.76-0.96) | 4.33E-01 | 1.03E-02 | 0.86(0.76-0.96) | 4.58E-01 |
| rs115853715 | T | 0.3898 | 0.3533 | 5.63E-03 | 1.178 | 1.86E-01 | 7.38E-03 | 1.17(1.04-1.32) | 4.33E-01 | 5.18E-03 | 1.18(1.05-1.33) | 4.38E-01 |
| rs114199250 | T | 0.3898 | 0.3533 | 5.63E-03 | 1.178 | 1.86E-01 | 7.38E-03 | 1.17(1.04-1.32) | 4.33E-01 | 5.18E-03 | 1.18(1.05-1.33) | 4.38E-01 |
| rs114824107 | C | 0.3898 | 0.3533 | 5.63E-03 | 1.178 | 1.86E-01 | 7.38E-03 | 1.17(1.04-1.32) | 4.33E-01 | 5.18E-03 | 1.18(1.05-1.33) | 4.38E-01 |
| rs114594878 | A | 0.3898 | 0.3533 | 5.63E-03 | 1.178 | 1.86E-01 | 7.38E-03 | 1.17(1.04-1.32) | 4.33E-01 | 5.18E-03 | 1.18(1.05-1.33) | 4.38E-01 |
| rs116303336 | T | 0.3898 | 0.3533 | 5.63E-03 | 1.178 | 1.86E-01 | 7.38E-03 | 1.17(1.04-1.32) | 4.33E-01 | 5.18E-03 | 1.18(1.05-1.33) | 4.38E-01 |
| rs116507134 | C | 0.3898 | 0.3533 | 5.63E-03 | 1.178 | 1.86E-01 | 7.38E-03 | 1.17(1.04-1.32) | 4.33E-01 | 5.18E-03 | 1.18(1.05-1.33) | 4.38E-01 |
| rs114154393 | T | 0.4556 | 0.4135 | 5.64E-03 | 1.175 | 1.86E-01 | 1.40E-02 | 1.16(1.03-1.3) | 4.59E-01 | 6.87E-03 | 1.17(1.05-1.32) | 4.38E-01 |
| rs118061599 | C | 0.1206 | 0.09867 | 5.71E-03 | 1.29 | 1.87E-01 | 1.23E-02 | 1.26(1.05-1.51) | 4.38E-01 | 9.25E-03 | 1.27(1.06-1.53) | 4.38E-01 |
| rs116444273 | A | 0.1572 | 0.1327 | 5.81E-03 | 1.258 | 1.88E-01 | 1.68E-02 | 1.22(1.04-1.44) | 4.59E-01 | 9.59E-03 | 1.24(1.06-1.47) | 4.42E-01 |
| rs116126317 | G | 0.3463 | 0.3097 | 5.82E-03 | 1.189 | 1.88E-01 | 2.18E-02 | 1.16(1.02-1.31) | 4.59E-01 | 1.82E-02 | 1.16(1.03-1.32) | 5.07E-01 |
| rs116186005 | C | 0.3755 | 0.3407 | 5.86E-03 | 1.179 | 1.88E-01 | 7.99E-03 | 1.17(1.04-1.32) | 4.33E-01 | 5.88E-03 | 1.18(1.05-1.33) | 4.38E-01 |
| rs115237455 | A | 0.2386 | 0.2724 | 5.87E-03 | 0.8339 | 1.88E-01 | 1.63E-02 | 0.85(0.75-0.97) | 4.59E-01 | 2.62E-02 | 0.86(0.76-0.98) | 5.07E-01 |
| rs116220605 | T | 0.2386 | 0.2724 | 5.87E-03 | 0.8339 | 1.88E-01 | 1.63E-02 | 0.85(0.75-0.97) | 4.59E-01 | 2.62E-02 | 0.86(0.76-0.98) | 5.07E-01 |
| rs116804843 | A | 0.2386 | 0.2724 | 5.87E-03 | 0.8339 | 1.88E-01 | 1.63E-02 | 0.85(0.75-0.97) | 4.59E-01 | 2.62E-02 | 0.86(0.76-0.98) | 5.07E-01 |
| rs115381170 | C | 0.2386 | 0.2724 | 5.87E-03 | 0.8339 | 1.88E-01 | 1.63E-02 | 0.85(0.75-0.97) | 4.59E-01 | 2.62E-02 | 0.86(0.76-0.98) | 5.07E-01 |
| rs114690903 | A | 0.2386 | 0.2724 | 5.87E-03 | 0.8339 | 1.88E-01 | 1.63E-02 | 0.85(0.75-0.97) | 4.59E-01 | 2.62E-02 | 0.86(0.76-0.98) | 5.07E-01 |
| rs116713490 | T | 0.2386 | 0.2724 | 5.87E-03 | 0.8339 | 1.88E-01 | 1.63E-02 | 0.85(0.75-0.97) | 4.59E-01 | 2.62E-02 | 0.86(0.76-0.98) | 5.07E-01 |
| rs114585607 | T | 0.2386 | 0.2724 | 5.87E-03 | 0.8339 | 1.88E-01 | 1.63E-02 | 0.85(0.75-0.97) | 4.59E-01 | 2.62E-02 | 0.86(0.76-0.98) | 5.07E-01 |
| rs114130799 | A | 0.2386 | 0.2724 | 5.87E-03 | 0.8339 | 1.88E-01 | 1.63E-02 | 0.85(0.75-0.97) | 4.59E-01 | 2.62E-02 | 0.86(0.76-0.98) | 5.07E-01 |
| rs115271142 | T | 0.3885 | 0.3525 | 5.98E-03 | 1.177 | 1.91E-01 | 7.80E-03 | 1.17(1.04-1.32) | 4.33E-01 | 5.57E-03 | 1.18(1.05-1.33) | 4.38E-01 |
| rs115217144 | C | 0.3501 | 0.3884 | 6.02E-03 | 0.85 | 1.92E-01 | 7.66E-03 | 0.85(0.76-0.96) | 4.33E-01 | 1.23E-02 | 0.86(0.77-0.97) | 4.81E-01 |
| SNP_B_31432900 | T | 0.1998 | 0.2321 | 6.08E-03 | 0.8233 | 1.93E-01 | 3.42E-02 | 0.86(0.75-0.99) | 4.67E-01 | 4.02E-02 | 0.86(0.75-0.99) | 5.09E-01 |
| rs115023870 | A | 0.3734 | 0.3389 | 6.10E-03 | 1.178 | 1.93E-01 | 8.00E-03 | 1.17(1.04-1.32) | 4.33E-01 | 6.04E-03 | 1.18(1.05-1.33) | 4.38E-01 |
| rs118160129 | A | 0.08958 | 0.06948 | 6.10E-03 | 1.349 | 1.93E-01 | 1.96E-02 | 1.29(1.04-1.6) | 4.59E-01 | 1.52E-02 | 1.31(1.05-1.62) | 5.07E-01 |
| rs116639959 | A | 0.4548 | 0.4132 | 6.23E-03 | 1.173 | 1.95E-01 | 1.54E-02 | 1.15(1.03-1.29) | 4.59E-01 | 7.77E-03 | 1.17(1.04-1.31) | 4.38E-01 |
| rs115499238 | C | 0.3717 | 0.3381 | 6.23E-03 | 1.178 | 1.95E-01 | 9.10E-03 | 1.17(1.04-1.32) | 4.33E-01 | 5.59E-03 | 1.18(1.05-1.33) | 4.38E-01 |
| 32362978 | G | 0.3368 | 0.3038 | 6.29E-03 | 1.183 | 1.95E-01 | 3.98E-02 | 1.14(1.01-1.29) | 4.75E-01 | 3.44E-02 | 1.14(1.01-1.29) | 5.09E-01 |
| rs115343609 | G | 0.2463 | 0.2783 | 6.32E-03 | 0.8348 | 1.95E-01 | 5.47E-03 | 0.83(0.73-0.95) | 4.33E-01 | 7.75E-03 | 0.84(0.73-0.95) | 4.38E-01 |
| rs147277826 | A | 0.1236 | 0.102 | 6.32E-03 | 1.283 | 1.95E-01 | 1.44E-02 | 1.25(1.05-1.5) | 4.59E-01 | 1.11E-02 | 1.26(1.06-1.51) | 4.64E-01 |
| rs146030034 | T | 0.3437 | 0.306 | 6.35E-03 | 1.185 | 1.95E-01 | 1.14E-02 | 1.17(1.04-1.33) | 4.38E-01 | 1.07E-02 | 1.17(1.04-1.33) | 4.62E-01 |
| rs116819064 | T | 0.3441 | 0.3064 | 6.40E-03 | 1.185 | 1.95E-01 | 1.13E-02 | 1.17(1.04-1.33) | 4.38E-01 | 1.07E-02 | 1.17(1.04-1.33) | 4.61E-01 |
| rs116513305 | T | 0.3441 | 0.3064 | 6.40E-03 | 1.185 | 1.95E-01 | 1.13E-02 | 1.17(1.04-1.33) | 4.38E-01 | 1.07E-02 | 1.17(1.04-1.33) | 4.61E-01 |
| rs114336422 | T | 0.1641 | 0.143 | 6.47E-03 | 1.247 | 1.95E-01 | 4.60E-02 | 1.18(1-1.39) | 5.08E-01 | 8.01E-02 | 1.16(0.98-1.36) | 5.89E-01 |
| rs115942205 | G | 0.3475 | 0.3115 | 6.47E-03 | 1.186 | 1.95E-01 | 2.37E-02 | 1.15(1.02-1.31) | 4.59E-01 | 2.02E-02 | 1.16(1.02-1.31) | 5.07E-01 |
| rs115950962 | G | 0.3475 | 0.3115 | 6.47E-03 | 1.186 | 1.95E-01 | 2.37E-02 | 1.15(1.02-1.31) | 4.59E-01 | 2.02E-02 | 1.16(1.02-1.31) | 5.07E-01 |
| rs115111840 | T | 0.3475 | 0.3115 | 6.47E-03 | 1.186 | 1.95E-01 | 2.37E-02 | 1.15(1.02-1.31) | 4.59E-01 | 2.02E-02 | 1.16(1.02-1.31) | 5.07E-01 |
| rs116469599 | T | 0.3475 | 0.3115 | 6.47E-03 | 1.186 | 1.95E-01 | 2.37E-02 | 1.15(1.02-1.31) | 4.59E-01 | 2.02E-02 | 1.16(1.02-1.31) | 5.07E-01 |
| rs115215374 | A | 0.3475 | 0.3115 | 6.47E-03 | 1.186 | 1.95E-01 | 2.37E-02 | 1.15(1.02-1.31) | 4.59E-01 | 2.02E-02 | 1.16(1.02-1.31) | 5.07E-01 |
| rs114397747 | A | 0.3475 | 0.3115 | 6.47E-03 | 1.186 | 1.95E-01 | 2.37E-02 | 1.15(1.02-1.31) | 4.59E-01 | 2.02E-02 | 1.16(1.02-1.31) | 5.07E-01 |
| rs137919531 | A | 0.3484 | 0.3123 | 6.49E-03 | 1.186 | 1.95E-01 | 2.41E-02 | 1.15(1.02-1.31) | 4.59E-01 | 2.08E-02 | 1.16(1.02-1.31) | 5.07E-01 |
| rs139343544 | A | 0.3915 | 0.3551 | 6.50E-03 | 1.174 | 1.95E-01 | 7.98E-03 | 1.17(1.04-1.31) | 4.33E-01 | 5.65E-03 | 1.18(1.05-1.32) | 4.38E-01 |
| rs115631569 | G | 0.239 | 0.2724 | 6.52E-03 | 0.8359 | 1.95E-01 | 1.78E-02 | 0.85(0.75-0.97) | 4.59E-01 | 2.86E-02 | 0.86(0.76-0.98) | 5.07E-01 |
| rs114724577 | C | 0.239 | 0.2724 | 6.52E-03 | 0.8359 | 1.95E-01 | 1.78E-02 | 0.85(0.75-0.97) | 4.59E-01 | 2.86E-02 | 0.86(0.76-0.98) | 5.07E-01 |
| rs116015457 | G | 0.2506 | 0.2217 | 6.52E-03 | 1.205 | 1.95E-01 | 6.12E-02 | 1.14(0.99-1.31) | 5.66E-01 | 4.33E-02 | 1.15(1-1.32) | 5.09E-01 |
| rs116309065 | T | 0.2506 | 0.2217 | 6.52E-03 | 1.205 | 1.95E-01 | 6.12E-02 | 1.14(0.99-1.31) | 5.66E-01 | 4.33E-02 | 1.15(1-1.32) | 5.09E-01 |
| rs116815305 | G | 0.2506 | 0.2217 | 6.52E-03 | 1.205 | 1.95E-01 | 6.12E-02 | 1.14(0.99-1.31) | 5.66E-01 | 4.33E-02 | 1.15(1-1.32) | 5.09E-01 |
| rs115874709 | G | 0.2506 | 0.2217 | 6.52E-03 | 1.205 | 1.95E-01 | 6.12E-02 | 1.14(0.99-1.31) | 5.66E-01 | 4.33E-02 | 1.15(1-1.32) | 5.09E-01 |
| rs114809735 | G | 0.2506 | 0.2217 | 6.52E-03 | 1.205 | 1.95E-01 | 6.12E-02 | 1.14(0.99-1.31) | 5.66E-01 | 4.33E-02 | 1.15(1-1.32) | 5.09E-01 |
| rs114351193 | C | 0.2506 | 0.2217 | 6.52E-03 | 1.205 | 1.95E-01 | 6.12E-02 | 1.14(0.99-1.31) | 5.66E-01 | 4.33E-02 | 1.15(1-1.32) | 5.09E-01 |
| rs116801443 | C | 0.2506 | 0.2217 | 6.52E-03 | 1.205 | 1.95E-01 | 6.12E-02 | 1.14(0.99-1.31) | 5.66E-01 | 4.33E-02 | 1.15(1-1.32) | 5.09E-01 |
| rs114647167 | A | 0.2506 | 0.2217 | 6.52E-03 | 1.205 | 1.95E-01 | 6.12E-02 | 1.14(0.99-1.31) | 5.66E-01 | 4.33E-02 | 1.15(1-1.32) | 5.09E-01 |
| rs769178 | T | 0.1529 | 0.184 | 6.56E-03 | 0.8073 | 1.95E-01 | 4.15E-02 | 0.85(0.73-0.99) | 4.86E-01 | 4.97E-02 | 0.85(0.73-1) | 5.21E-01 |
| rs114571796 | G | 0.3463 | 0.3082 | 6.62E-03 | 1.184 | 1.95E-01 | 1.08E-02 | 1.17(1.04-1.33) | 4.33E-01 | 1.03E-02 | 1.17(1.04-1.33) | 4.58E-01 |
| rs116757602 | A | 0.3463 | 0.3082 | 6.62E-03 | 1.184 | 1.95E-01 | 1.08E-02 | 1.17(1.04-1.33) | 4.33E-01 | 1.03E-02 | 1.17(1.04-1.33) | 4.58E-01 |
| rs115041792 | C | 0.07924 | 0.0983 | 6.72E-03 | 0.7575 | 1.95E-01 | 7.56E-03 | 0.76(0.62-0.93) | 4.33E-01 | 9.13E-03 | 0.76(0.62-0.94) | 4.38E-01 |
| rs114493684 | A | 0.2153 | 0.1803 | 6.73E-03 | 1.218 | 1.95E-01 | 7.66E-03 | 1.22(1.05-1.4) | 4.33E-01 | 5.70E-03 | 1.23(1.06-1.42) | 4.38E-01 |
| rs117801930 | A | 0.1525 | 0.1275 | 6.75E-03 | 1.259 | 1.95E-01 | 2.05E-02 | 1.22(1.03-1.44) | 4.59E-01 | 1.63E-02 | 1.23(1.04-1.45) | 5.07E-01 |
| rs116160880 | A | 0.4281 | 0.4675 | 6.77E-03 | 0.8545 | 1.95E-01 | 3.94E-02 | 0.89(0.79-0.99) | 4.75E-01 | 3.52E-02 | 0.88(0.79-0.99) | 5.09E-01 |
| rs116164273 | G | 0.3445 | 0.3071 | 6.89E-03 | 1.183 | 1.95E-01 | 1.23E-02 | 1.17(1.04-1.32) | 4.38E-01 | 1.17E-02 | 1.17(1.04-1.33) | 4.64E-01 |
| rs114991084 | C | 0.05728 | 0.07465 | 6.92E-03 | 0.7273 | 1.95E-01 | 9.69E-03 | 0.74(0.58-0.93) | 4.33E-01 | 9.78E-03 | 0.74(0.58-0.93) | 4.44E-01 |
| rs115950885 | C | 0.3717 | 0.3385 | 6.96E-03 | 1.175 | 1.95E-01 | 9.76E-03 | 1.17(1.04-1.32) | 4.33E-01 | 6.06E-03 | 1.18(1.05-1.33) | 4.38E-01 |
| rs116211155 | G | 0.3725 | 0.3392 | 6.97E-03 | 1.176 | 1.95E-01 | 9.92E-03 | 1.17(1.04-1.32) | 4.33E-01 | 6.16E-03 | 1.18(1.05-1.33) | 4.38E-01 |
| rs116272805 | C | 0.3725 | 0.3392 | 6.97E-03 | 1.176 | 1.95E-01 | 9.92E-03 | 1.17(1.04-1.32) | 4.33E-01 | 6.16E-03 | 1.18(1.05-1.33) | 4.38E-01 |
| rs114757830 | A | 0.3725 | 0.3392 | 6.97E-03 | 1.176 | 1.95E-01 | 9.92E-03 | 1.17(1.04-1.32) | 4.33E-01 | 6.16E-03 | 1.18(1.05-1.33) | 4.38E-01 |
| rs141995811 | C | 0.3725 | 0.3392 | 6.97E-03 | 1.176 | 1.95E-01 | 9.92E-03 | 1.17(1.04-1.32) | 4.33E-01 | 6.16E-03 | 1.18(1.05-1.33) | 4.38E-01 |
| rs115549174 | T | 0.3441 | 0.3067 | 6.98E-03 | 1.183 | 1.95E-01 | 1.23E-02 | 1.17(1.04-1.32) | 4.38E-01 | 1.16E-02 | 1.17(1.04-1.33) | 4.64E-01 |
| rs114423912 | A | 0.3441 | 0.3067 | 6.98E-03 | 1.183 | 1.95E-01 | 1.23E-02 | 1.17(1.04-1.32) | 4.38E-01 | 1.16E-02 | 1.17(1.04-1.33) | 4.64E-01 |
| rs116087240 | T | 0.3441 | 0.3067 | 6.98E-03 | 1.183 | 1.95E-01 | 1.23E-02 | 1.17(1.04-1.32) | 4.38E-01 | 1.16E-02 | 1.17(1.04-1.33) | 4.64E-01 |
| rs115643314 | A | 0.3441 | 0.3067 | 6.98E-03 | 1.183 | 1.95E-01 | 1.23E-02 | 1.17(1.04-1.32) | 4.38E-01 | 1.16E-02 | 1.17(1.04-1.33) | 4.64E-01 |
| rs115701307 | A | 0.3441 | 0.3067 | 6.98E-03 | 1.183 | 1.95E-01 | 1.23E-02 | 1.17(1.04-1.32) | 4.38E-01 | 1.16E-02 | 1.17(1.04-1.33) | 4.64E-01 |
| rs115194700 | C | 0.3441 | 0.3067 | 6.98E-03 | 1.183 | 1.95E-01 | 1.23E-02 | 1.17(1.04-1.32) | 4.38E-01 | 1.16E-02 | 1.17(1.04-1.33) | 4.64E-01 |
| rs115834004 | T | 0.3441 | 0.3067 | 6.98E-03 | 1.183 | 1.95E-01 | 1.23E-02 | 1.17(1.04-1.32) | 4.38E-01 | 1.16E-02 | 1.17(1.04-1.33) | 4.64E-01 |
| rs115785590 | T | 0.3441 | 0.3067 | 6.98E-03 | 1.183 | 1.95E-01 | 1.23E-02 | 1.17(1.04-1.32) | 4.38E-01 | 1.16E-02 | 1.17(1.04-1.33) | 4.64E-01 |
| rs116529263 | A | 0.3441 | 0.3067 | 6.98E-03 | 1.183 | 1.95E-01 | 1.23E-02 | 1.17(1.04-1.32) | 4.38E-01 | 1.16E-02 | 1.17(1.04-1.33) | 4.64E-01 |
| rs116753404 | C | 0.3441 | 0.3067 | 6.98E-03 | 1.183 | 1.95E-01 | 1.23E-02 | 1.17(1.04-1.32) | 4.38E-01 | 1.16E-02 | 1.17(1.04-1.33) | 4.64E-01 |
| rs116442828 | G | 0.3441 | 0.3067 | 6.98E-03 | 1.183 | 1.95E-01 | 1.23E-02 | 1.17(1.04-1.32) | 4.38E-01 | 1.16E-02 | 1.17(1.04-1.33) | 4.64E-01 |
| rs114555897 | C | 0.3441 | 0.3067 | 6.98E-03 | 1.183 | 1.95E-01 | 1.23E-02 | 1.17(1.04-1.32) | 4.38E-01 | 1.16E-02 | 1.17(1.04-1.33) | 4.64E-01 |
| rs114416689 | A | 0.3441 | 0.3067 | 6.98E-03 | 1.183 | 1.95E-01 | 1.23E-02 | 1.17(1.04-1.32) | 4.38E-01 | 1.16E-02 | 1.17(1.04-1.33) | 4.64E-01 |
| rs115949392 | T | 0.3441 | 0.3067 | 6.98E-03 | 1.183 | 1.95E-01 | 1.23E-02 | 1.17(1.04-1.32) | 4.38E-01 | 1.16E-02 | 1.17(1.04-1.33) | 4.64E-01 |
| rs117887590 | A | 0.3441 | 0.3067 | 6.98E-03 | 1.183 | 1.95E-01 | 1.23E-02 | 1.17(1.04-1.32) | 4.38E-01 | 1.16E-02 | 1.17(1.04-1.33) | 4.64E-01 |
| rs116382053 | G | 0.3441 | 0.3067 | 6.98E-03 | 1.183 | 1.95E-01 | 1.23E-02 | 1.17(1.04-1.32) | 4.38E-01 | 1.16E-02 | 1.17(1.04-1.33) | 4.64E-01 |
| rs115107349 | T | 0.3932 | 0.3577 | 6.98E-03 | 1.173 | 1.95E-01 | 9.44E-03 | 1.17(1.04-1.31) | 4.33E-01 | 6.93E-03 | 1.18(1.05-1.32) | 4.38E-01 |
| rs114700849 | G | 0.3876 | 0.3525 | 6.99E-03 | 1.173 | 1.95E-01 | 9.01E-03 | 1.17(1.04-1.31) | 4.33E-01 | 6.47E-03 | 1.18(1.05-1.32) | 4.38E-01 |
| rs116074181 | T | 0.3876 | 0.3525 | 6.99E-03 | 1.173 | 1.95E-01 | 9.01E-03 | 1.17(1.04-1.31) | 4.33E-01 | 6.47E-03 | 1.18(1.05-1.32) | 4.38E-01 |
| rs116613998 | T | 0.3876 | 0.3525 | 6.99E-03 | 1.173 | 1.95E-01 | 9.01E-03 | 1.17(1.04-1.31) | 4.33E-01 | 6.47E-03 | 1.18(1.05-1.32) | 4.38E-01 |
| rs116071283 | G | 0.3876 | 0.3525 | 6.99E-03 | 1.173 | 1.95E-01 | 9.01E-03 | 1.17(1.04-1.31) | 4.33E-01 | 6.47E-03 | 1.18(1.05-1.32) | 4.38E-01 |
| rs112561286 | A | 0.2459 | 0.282 | 6.99E-03 | 0.8374 | 1.95E-01 | 2.79E-02 | 0.86(0.76-0.98) | 4.63E-01 | 5.25E-02 | 0.88(0.77-1) | 5.28E-01 |
| rs115109764 | A | 0.3915 | 0.3555 | 7.19E-03 | 1.171 | 1.99E-01 | 8.84E-03 | 1.17(1.04-1.31) | 4.33E-01 | 6.32E-03 | 1.18(1.05-1.32) | 4.38E-01 |
| rs1800610 | A | 0.1727 | 0.2025 | 7.22E-03 | 0.8146 | 1.99E-01 | 3.72E-02 | 0.85(0.73-0.99) | 4.75E-01 | 4.41E-02 | 0.86(0.74-1) | 5.09E-01 |
| rs117875210 | C | 0.1236 | 0.1024 | 7.33E-03 | 1.277 | 1.99E-01 | 1.47E-02 | 1.25(1.05-1.5) | 4.59E-01 | 7.90E-03 | 1.28(1.07-1.53) | 4.38E-01 |
| rs114274155 | C | 0.3872 | 0.3525 | 7.34E-03 | 1.172 | 1.99E-01 | 9.59E-03 | 1.17(1.04-1.31) | 4.33E-01 | 6.86E-03 | 1.18(1.05-1.32) | 4.38E-01 |
| rs115102648 | A | 0.3872 | 0.3525 | 7.34E-03 | 1.172 | 1.99E-01 | 9.59E-03 | 1.17(1.04-1.31) | 4.33E-01 | 6.86E-03 | 1.18(1.05-1.32) | 4.38E-01 |
| rs116611975 | A | 0.3872 | 0.3525 | 7.34E-03 | 1.172 | 1.99E-01 | 9.59E-03 | 1.17(1.04-1.31) | 4.33E-01 | 6.86E-03 | 1.18(1.05-1.32) | 4.38E-01 |
| rs115350383 | G | 0.3872 | 0.3525 | 7.34E-03 | 1.172 | 1.99E-01 | 9.59E-03 | 1.17(1.04-1.31) | 4.33E-01 | 6.86E-03 | 1.18(1.05-1.32) | 4.38E-01 |
| SNP_DRB1_32657430 | G | 0.5069 | 0.4797 | 7.39E-03 | 1.168 | 1.99E-01 | 1.56E-01 | 1.09(0.97-1.23) | 6.89E-01 | 1.42E-01 | 1.09(0.97-1.23) | 7.22E-01 |
| AA_DRB1_10_32660118_Y | P | 0.5069 | 0.4797 | 7.39E-03 | 1.168 | 1.99E-01 | 1.56E-01 | 1.09(0.97-1.23) | 6.89E-01 | 1.42E-01 | 1.09(0.97-1.23) | 7.22E-01 |
| AA_DRB1_11_32660115_S | P | 0.5069 | 0.4797 | 7.39E-03 | 1.168 | 1.99E-01 | 1.56E-01 | 1.09(0.97-1.23) | 6.89E-01 | 1.42E-01 | 1.09(0.97-1.23) | 7.22E-01 |
| SNP_DRB1_32657475 | A | 0.5069 | 0.4797 | 7.39E-03 | 1.168 | 1.99E-01 | 1.56E-01 | 1.09(0.97-1.23) | 6.89E-01 | 1.42E-01 | 1.09(0.97-1.23) | 7.22E-01 |
| AA_DRB1_12_32660112 | T | 0.5069 | 0.4797 | 7.39E-03 | 1.168 | 1.99E-01 | 1.56E-01 | 1.09(0.97-1.23) | 6.89E-01 | 1.42E-01 | 1.09(0.97-1.23) | 7.22E-01 |
| SNP_DRB1_32660112 | G | 0.5069 | 0.4797 | 7.39E-03 | 1.168 | 1.99E-01 | 1.56E-01 | 1.09(0.97-1.23) | 6.89E-01 | 1.42E-01 | 1.09(0.97-1.23) | 7.22E-01 |
| AA_DRB1_149_32657431_H | P | 0.5069 | 0.4797 | 7.39E-03 | 1.168 | 1.99E-01 | 1.56E-01 | 1.09(0.97-1.23) | 6.89E-01 | 1.42E-01 | 1.09(0.97-1.23) | 7.22E-01 |
| SNP_DRB1_32660116_A | P | 0.5069 | 0.4797 | 7.39E-03 | 1.168 | 1.99E-01 | 1.56E-01 | 1.09(0.97-1.23) | 6.89E-01 | 1.42E-01 | 1.09(0.97-1.23) | 7.22E-01 |
| SNP_DRB1_32660117 | G | 0.5069 | 0.4797 | 7.39E-03 | 1.168 | 1.99E-01 | 1.56E-01 | 1.09(0.97-1.23) | 6.89E-01 | 1.42E-01 | 1.09(0.97-1.23) | 7.22E-01 |
| AA_DRB1_149_32657431_Q | A | 0.5069 | 0.4797 | 7.39E-03 | 1.168 | 1.99E-01 | 1.56E-01 | 1.09(0.97-1.23) | 6.89E-01 | 1.42E-01 | 1.09(0.97-1.23) | 7.22E-01 |
| SNP_DRB1_32660119_A | P | 0.5069 | 0.4797 | 7.39E-03 | 1.168 | 1.99E-01 | 1.56E-01 | 1.09(0.97-1.23) | 6.89E-01 | 1.42E-01 | 1.09(0.97-1.23) | 7.22E-01 |
| rs114566430 | C | 0.3437 | 0.3067 | 7.42E-03 | 1.182 | 1.99E-01 | 1.30E-02 | 1.17(1.03-1.32) | 4.53E-01 | 1.22E-02 | 1.17(1.04-1.32) | 4.79E-01 |
| rs115407392 | C | 0.3712 | 0.3385 | 7.51E-03 | 1.174 | 1.99E-01 | 1.05E-02 | 1.17(1.04-1.31) | 4.33E-01 | 6.55E-03 | 1.18(1.05-1.33) | 4.38E-01 |
| rs115124216 | G | 0.3712 | 0.3385 | 7.51E-03 | 1.174 | 1.99E-01 | 1.05E-02 | 1.17(1.04-1.31) | 4.33E-01 | 6.55E-03 | 1.18(1.05-1.33) | 4.38E-01 |
| rs116719250 | G | 0.3712 | 0.3385 | 7.51E-03 | 1.174 | 1.99E-01 | 1.05E-02 | 1.17(1.04-1.31) | 4.33E-01 | 6.55E-03 | 1.18(1.05-1.33) | 4.38E-01 |
| rs116557520 | G | 0.3712 | 0.3385 | 7.51E-03 | 1.174 | 1.99E-01 | 1.05E-02 | 1.17(1.04-1.31) | 4.33E-01 | 6.55E-03 | 1.18(1.05-1.33) | 4.38E-01 |
| rs115593921 | A | 0.3712 | 0.3385 | 7.51E-03 | 1.174 | 1.99E-01 | 1.05E-02 | 1.17(1.04-1.31) | 4.33E-01 | 6.55E-03 | 1.18(1.05-1.33) | 4.38E-01 |
| rs116683932 | T | 0.3712 | 0.3385 | 7.51E-03 | 1.174 | 1.99E-01 | 1.05E-02 | 1.17(1.04-1.31) | 4.33E-01 | 6.55E-03 | 1.18(1.05-1.33) | 4.38E-01 |
| rs114077815 | C | 0.3712 | 0.3385 | 7.51E-03 | 1.174 | 1.99E-01 | 1.05E-02 | 1.17(1.04-1.31) | 4.33E-01 | 6.55E-03 | 1.18(1.05-1.33) | 4.38E-01 |
| rs116431837 | G | 0.3712 | 0.3385 | 7.51E-03 | 1.174 | 1.99E-01 | 1.05E-02 | 1.17(1.04-1.31) | 4.33E-01 | 6.55E-03 | 1.18(1.05-1.33) | 4.38E-01 |
| rs116271788 | T | 0.3712 | 0.3385 | 7.51E-03 | 1.174 | 1.99E-01 | 1.05E-02 | 1.17(1.04-1.31) | 4.33E-01 | 6.55E-03 | 1.18(1.05-1.33) | 4.38E-01 |
| rs114404011 | C | 0.3531 | 0.3899 | 7.52E-03 | 0.8541 | 1.99E-01 | 9.28E-03 | 0.86(0.76-0.96) | 4.33E-01 | 1.48E-02 | 0.87(0.77-0.97) | 5.07E-01 |
| rs114060903 | C | 0.3454 | 0.3862 | 7.53E-03 | 0.8515 | 1.99E-01 | 1.62E-01 | 0.92(0.81-1.04) | 6.95E-01 | 1.75E-01 | 0.92(0.81-1.04) | 7.43E-01 |
| rs116167820 | T | 0.06245 | 0.04324 | 7.53E-03 | 1.417 | 1.99E-01 | 8.65E-03 | 1.41(1.09-1.83) | 4.33E-01 | 7.30E-03 | 1.42(1.1-1.84) | 4.38E-01 |
| rs118095083 | T | 0.06245 | 0.04324 | 7.53E-03 | 1.417 | 1.99E-01 | 8.65E-03 | 1.41(1.09-1.83) | 4.33E-01 | 7.30E-03 | 1.42(1.1-1.84) | 4.38E-01 |

a A: absent; P: present; b EAF: effect allele frequency; c Adjusted for age and gender; dPFDR were calculated based on all 14930 imputed HLA variants; ePFDR were calculated based on all 14929 imputed HLA variants with rs114401688 as covariate; fPFDR were calculated based on all 14928 imputed HLA variants with rs114401688 and rs115126566 as covariates; g NA：Not available due to fail to converge in condition analysis

**Supplemetary Table 4. Summary of the most significant amino acid polymorphisms associated with HBV-related HCC in Han Chinese (P＜1×10-3).**

| **Variants** | **Effect  allelea** | **EAF b** | | **Pc** | **ORc** | **Pfdrd** | **Conditon on  HLA_DQB1_04 and  HLA-DRB1_04** | | **Conditon on HLA_DQB1_04** | | **Conditon onHLA_DQB1_0401** | | **Condition on HLA_DRB1_04** | | **Condition on HLA_DRB1_0405** | |
| --- | --- | --- | --- | --- | --- | --- | --- | --- | --- | --- | --- | --- | --- | --- | --- | --- |
| **Cases** | **Controls** | **ORc** | **Pc** | **ORc** | **Pc** | **ORc** | **Pc** | **ORc** | **Pc** | **ORc** | **Pc** |
| AA_DQB1_56_32740669 | L | 0.04608 | 0.0765 | 5.38E-06 | 0.5652 | 2.43E-03 | NAe | NAe | NAe | NAe | 0.37(0.19-0.75) | 5.20E-03 | 0.68(0.49-0.92) | 1.44E-02 | 0.4(0.23-0.71) | 1.70E-03 |
| AA_DQB1_70_32740627_E | P | 0.04608 | 0.0765 | 5.38E-06 | 0.5652 | 2.43E-03 | NAe | NAe | NAe | NAe | 0.37(0.19-0.75) | 5.20E-03 | 0.68(0.49-0.92) | 1.44E-02 | 0.4(0.23-0.71) | 1.70E-03 |
| AA_DQB1_71_32740624_D | P | 0.04608 | 0.0765 | 5.38E-06 | 0.5652 | 2.43E-03 | NAe | NAe | NAe | NAe | 0.37(0.19-0.75) | 5.20E-03 | 0.68(0.49-0.92) | 1.44E-02 | 0.4(0.23-0.71) | 1.70E-03 |
| AA_DQB1_9_32740810_F | P | 0.08656 | 0.1231 | 1.06E-05 | 0.6537 | 4.50E-03 | 0.80(0.60-1.06) | 1.21E-01 | 0.81(0.61-1.07) | 1.39E-01 | 0.72(0.55-0.93) | 1.24E-02 | 0.74(0.6-0.92) | 5.47E-03 | 0.7(0.54-0.9) | 5.46E-03 |
| AA_DRB1_13_32660109_H | P | 0.08183 | 0.1183 | 1.96E-05 | 0.6575 | 5.98E-03 | NAe | NAe | 0.8(0.63-1.03) | 7.79E-02 | 0.73(0.56-0.95) | 2.06E-02 | NAe | NAe | 0.71(0.54-0.92) | 1.12E-02 |
| AA_DRB1_180_32657338_L | P | 0.08183 | 0.1183 | 1.96E-05 | 0.6575 | 5.98E-03 | NAe | NAe | 0.8(0.63-1.03) | 7.79E-02 | 0.73(0.56-0.95) | 2.06E-02 | NAe | NAe | 0.71(0.54-0.92) | 1.12E-02 |
| AA_DRB1_180_32657338_V | A | 0.08183 | 0.1183 | 1.96E-05 | 0.6575 | 5.98E-03 | NAe | NAe | 0.8(0.63-1.03) | 7.79E-02 | 0.73(0.56-0.95) | 2.06E-02 | NAe | NAe | 0.71(0.54-0.92) | 1.12E-02 |
| AA_DRB1_-24_32665481_F | P | 0.08183 | 0.1183 | 1.96E-05 | 0.6575 | 5.98E-03 | NAe | NAe | 0.8(0.63-1.03) | 7.79E-02 | 0.73(0.56-0.95) | 2.06E-02 | NAe | NAe | 0.71(0.54-0.92) | 1.12E-02 |
| AA_DRB1_-24_32665481_L | A | 0.08183 | 0.1183 | 1.96E-05 | 0.6575 | 5.98E-03 | NAe | NAe | 0.8(0.63-1.03) | 7.79E-02 | 0.73(0.56-0.95) | 2.06E-02 | NAe | NAe | 0.71(0.54-0.92) | 1.12E-02 |
| AA_DRB1_33_32660049 | H | 0.08183 | 0.1183 | 1.96E-05 | 0.6575 | 5.98E-03 | NAe | NAe | 0.8(0.63-1.03) | 7.79E-02 | 0.73(0.56-0.95) | 2.06E-02 | NAe | NAe | 0.71(0.54-0.92) | 1.12E-02 |
| AA_DRB1_96_32657590_Y | P | 0.08183 | 0.1183 | 1.96E-05 | 0.6575 | 5.98E-03 | NAe | NAe | 0.8(0.63-1.03) | 7.79E-02 | 0.73(0.56-0.95) | 2.06E-02 | NAe | NAe | 0.71(0.54-0.92) | 1.12E-02 |
| AA_DRB1_11_32660115_V | P | 0.08613 | 0.1186 | 1.69E-04 | 0.6952 | 2.87E-02 | 14.61(1.76-121.4) | 1.31E-02 | 0.87(0.68-1.11) | 2.63E-01 | 0.81(0.63-1.04) | 1.03E-01 | 13.77(1.71-111.3) | 1.39E-02 | 0.78(0.6-1.02) | 6.63E-02 |
| AA_DRB1_120_32657518_N | P | 0.08613 | 0.1186 | 1.69E-04 | 0.6952 | 2.87E-02 | 14.61(1.76-121.4) | 1.31E-02 | 0.87(0.68-1.11) | 2.63E-01 | 0.81(0.63-1.04) | 1.03E-01 | 13.77(1.71-111.3) | 1.39E-02 | 0.78(0.6-1.02) | 6.63E-02 |
| AA_DRB1_120_32657518_S | A | 0.08613 | 0.1186 | 1.69E-04 | 0.6952 | 2.87E-02 | 14.61(1.76-121.4) | 1.31E-02 | 0.87(0.68-1.11) | 2.63E-01 | 0.81(0.63-1.04) | 1.03E-01 | 13.77(1.71-111.3) | 1.39E-02 | 0.78(0.6-1.02) | 6.63E-02 |
| AA_DQB1_23_32740768 | L | 0.04091 | 0.0643 | 1.70E-04 | 0.6067 | 2.87E-02 | 2.11(0.98-4.54) | 5.70E-02 | 1.6(0.77-3.33) | 2.05E-01 | NAe | NAe | 0.81(0.57-1.15) | 2.42E-01 | 0.47(0.17-1.31) | 1.49E-01 |
| AA_DQB1_-6_32742283_A | P | 0.04091 | 0.0643 | 1.70E-04 | 0.6067 | 2.87E-02 | 2.11(0.98-4.54) | 5.70E-02 | 1.6(0.77-3.33) | 2.05E-01 | NAe | NAe | 0.81(0.57-1.15) | 2.42E-01 | 0.47(0.17-1.31) | 1.49E-01 |
| AA_DRB1_96_32657590_H | A | 0.1783 | 0.2195 | 2.46E-04 | 0.7657 | 3.68E-02 | 0.90(0.74-1.09) | 2.74E-01 | 0.86(0.73-1) | 5.56E-02 | 0.84(0.71-0.98) | 3.02E-02 | 0.9(0.75-1.09) | 2.99E-01 | 0.83(0.71-0.98) | 2.34E-02 |
| AA_B_66_31432518_I | A | 0.2498 | 0.2069 | 2.74E-04 | 1.286 | 3.83E-02 | 1.23(1.07-1.41) | 3.36E-03 | 1.24(1.08-1.42) | 1.92E-03 | 1.25(1.09-1.43) | 1.29E-03 | 1.23(1.08-1.42) | 2.72E-03 | 1.25(1.09-1.44) | 1.16E-03 |
| AA_C_95_31347092_I | P | 0.2382 | 0.2775 | 7.18E-04 | 0.7977 | 7.24E-02 | 0.8(0.70-0.91) | 7.26E-04 | 0.8(0.7-0.91) | 8.25E-04 | 0.8(0.7-0.91) | 6.75E-04 | 0.79(0.7-0.91) | 6.12E-04 | 0.8(0.7-0.91) | 8.43E-04 |
| AA_C_95_31347092_L | A | 0.245 | 0.2842 | 8.15E-04 | 0.8006 | 8.06E-02 | 0.8(0.70-0.91) | 8.64E-04 | 0.8(0.7-0.91) | 8.22E-04 | 0.8(0.7-0.91) | 6.94E-04 | 0.8(0.7-0.91) | 8.89E-04 | 0.8(0.7-0.91) | 8.72E-04 |

a A: absent; P: present; Except P and A, other character in this column are amino acid abbreviations;

b EAF: effect allele frequency;

c Adjusted for age and gender;

dPFDR were calculated based on all 14930 imputed HLA variants;

e NA：Not available due to fail to converge in condition analysis

**Supplemetary Table 5. Confirmation results of reported SNPs by GWAS in HLA region**

| **Variants** | **Rsid in our data** | **Risk  allele** | **OR** | **Our data** | | | | |
| --- | --- | --- | --- | --- | --- | --- | --- | --- |
| **EAFa** | | **Effect allele** | **ORb (95%CI)** | **Pb** |
| **Cases** | **Controls** |
| rs9272105 | rs112115374 | A | 1.28 | 0.4798 | 0.514 | G | 0.83(0.74-0.93) | 1.22E-03 |
| rs9275319c | rs114401688 | A | 1.49 | 0.08096 | 0.1227 | G | 0.62(0.51-0.75) | 1.05E-06 |
| rs2523961 | rs115385400 | A | 2.02 | 0.1494 | 0.1423 | A | 1.07(0.91-1.26) | 4.25E-01 |
| rs1110446 | rs114961658 | T | 2.1 | 0.1718 | 0.1556 | T | 1.13(0.97-1.32) | 1.17E-01 |
| rs3094137d | rs115039747 | A | 1.74 | 0.05728 | 0.05728 | C | 0.96(0.75-1.23) | 7.43E-01 |
| rs2295119 | rs116109200 | G | 0.59 | 0.2455 | 0.2409 | T | 1.00(0.88-1.14) | 9.91E-01 |

a EAF: effect allele frequency;

bAdjusted for age and gender;

cG=G in rs114401688, A=A in rs114401688, R2 = 1 in 1000 genome CHB;

dA=C in rs115039747, G=T in rs115039747, R2 = 1 in 1000 genome CHB;

**Supplemetary Table 6. Association between HLA zygosity and hepatocellular carcinoma (HCC).**

| **HLA Zygosity** | **HCC cases** | **Controls** | **All (1161 VS. 1353)** | |  | **Age >= 50 (680 VS. 606)** | |  | **Age < 50 (481 VS. 747)** | |
| --- | --- | --- | --- | --- | --- | --- | --- | --- | --- | --- |
| **OR (95%CI)a** | **Pa** | **OR (95%CI)a** | **Pa** | **OR (95%CI)a** | **Pa** |
| Class II loci (%) |  |  |  |  |  |  |  |  |  |  |
| Heterozygous at all loci | 645 | 788 | ref. |  |  | ref. |  |  | ref. |  |
| Homozygous in at least one locus | 516 | 565 | 1.13 (0.96-1.33) | 0.1430406 |  | 1.17 (0.94-1.46) | 1.71E-01 |  | 1.06 (0.83-1.35) | 0.6563533 |
| HLA-DPB1 (%) |  |  |  |  |  |  |  |  |  |  |
| Heterozygote | 805 | 943 | ref. |  |  | ref. |  |  | ref. |  |
| Homozygote | 356 | 410 | 1.02 (0.86-1.21) | 0.8324228 |  | 0.97 (0.77-1.23) | 8.05E-01 |  | 1.06 (0.82-1.38) | 0.6437146 |
| HLA-DQA1 (%) |  |  |  |  |  |  |  |  |  |  |
| Heterozygote | 1131 | 1313 | ref. |  |  | ref. |  |  | ref. |  |
| Homozygote | 30 | 40 | 0.91 (0.56-1.48) | 0.7043549 |  | 0.77 (0.38-1.54) | 4.55E-01 |  | 1.02 (0.51-2.04) | 0.9550717 |
| HLA-DQB1 (%) |  |  |  |  |  |  |  |  |  |  |
| Heterozygote | 929 | 1113 | ref. |  |  | ref. |  |  | ref. |  |
| Homozygote | 232 | 240 | 1.19 (0.97-1.46) | 0.0953874 |  | ***1.38 (1.04-1.84)*** | ***2.74E-02*** |  | 0.99 (0.73-1.34) | 0.954519 |
| HLA-DRB1 (%) |  |  |  |  |  |  |  |  |  |  |
| Heterozygote | 1027 | 1211 | ref. |  |  | ref. |  |  | ref. |  |
| Homozygote | 134 | 142 | 1.09 (0.84-1.40) | 0.525237 |  | 1.11 (0.79-1.56) | 5.63E-01 |  | 1.02 (0.70-1.51) | 0.9035663 |

aAdjusted for age and gender;
